# Supplementary material for: The effect of σ/π, σ and π donors on the basicity of silylene superbases: a density functional theory study
Source: Royal Society of Chemistry journal article supplement (doi:10.1039/c8nj00263k), 2018-01-01
Supplement: c8nj00263k1.pdf [file c8nj00263k1.pdf]

## Supporting Information

### *The Role of $\sigma/\pi$ , $\sigma$ and $\pi$ Donors on the Basicity of Silylene Superbases: A Density Functional Theory Study*

Abul Kalam Biswas,<sup>†</sup> Mrinal Kanti Si, Bishwajit Ganguly\*

Analytical Discipline and Centralized Instrument Facility, Academy of Scientific and Innovative Research, CSIR–Central Salt & Marine Chemicals Research Institute, Bhavnagar, Gujarat, India-364 002.

<sup>†</sup>Present address: Department of Chemistry, Mahishadal Raj College, West Bengal, India-721628.

Fax: (+91)-278-2567562, Telephone - +91-278-2567760 Ext: 6770.

E-mail: gang\_12@rediffmail.com

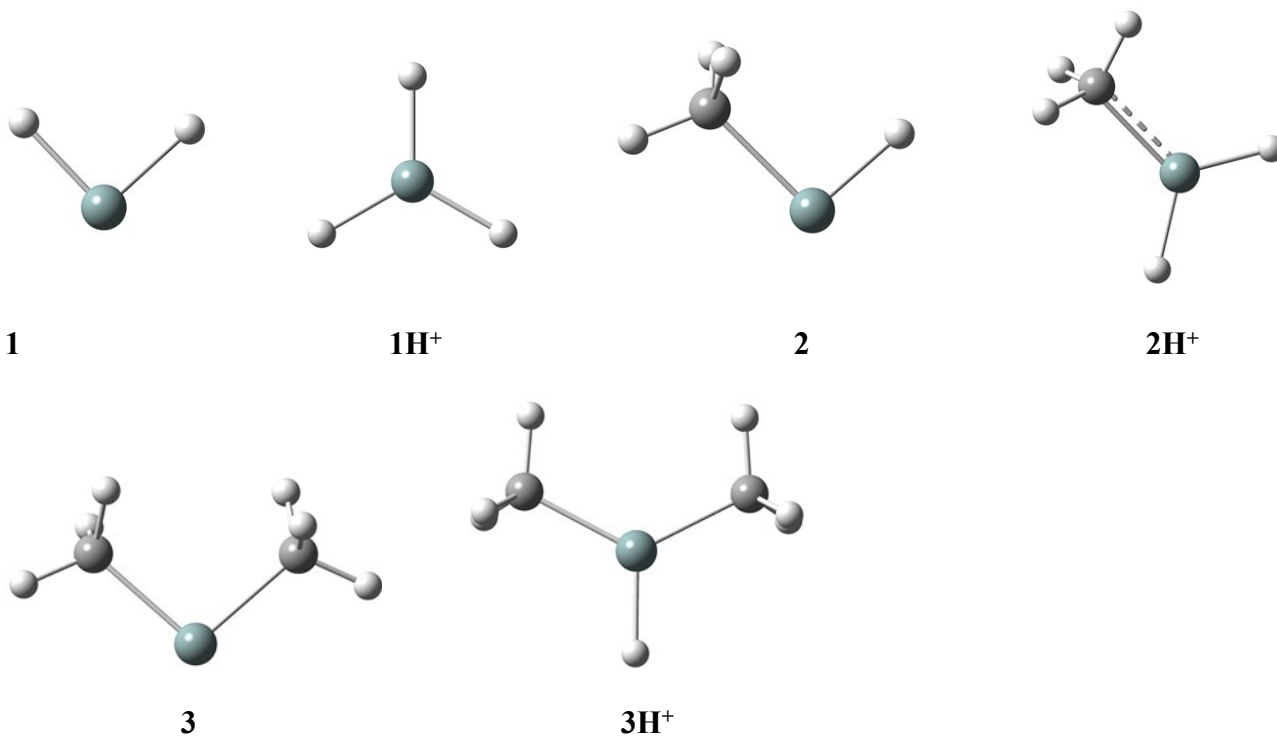

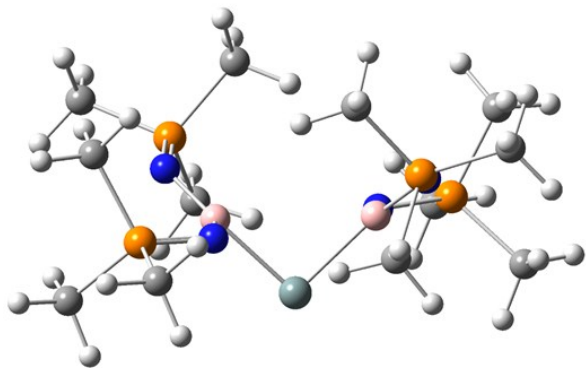

4

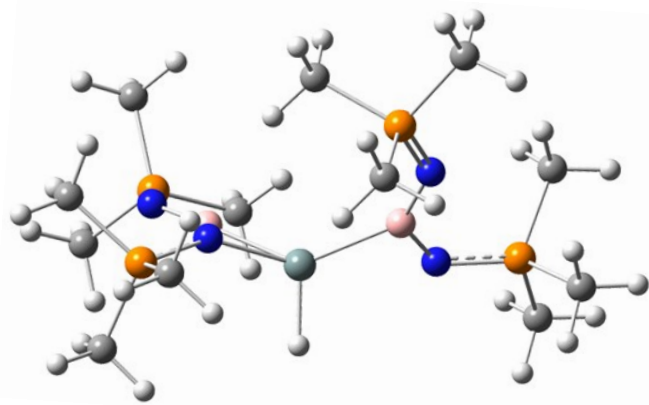

4H<sup>+</sup>

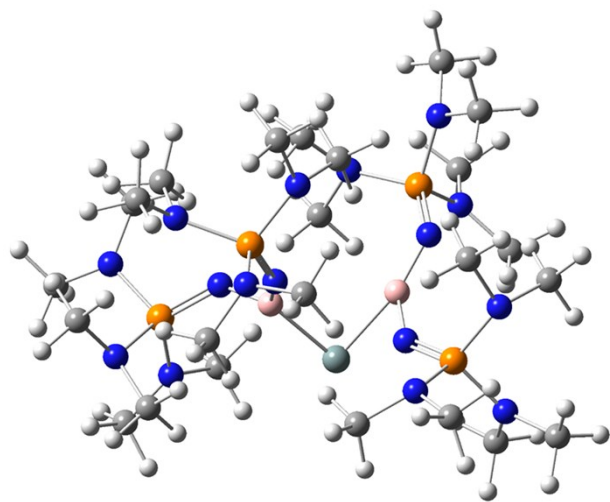

5

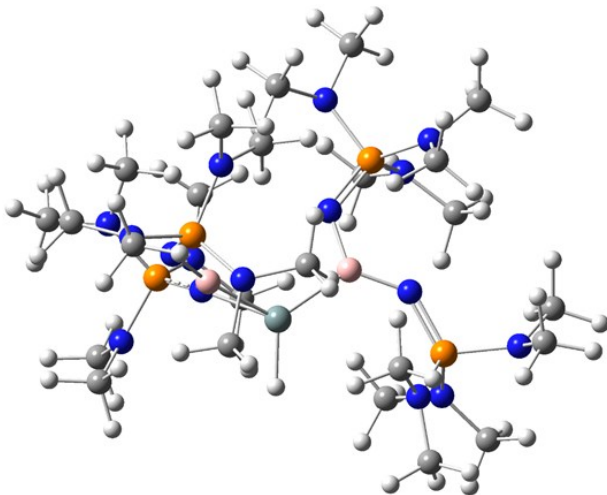

5H<sup>+</sup>

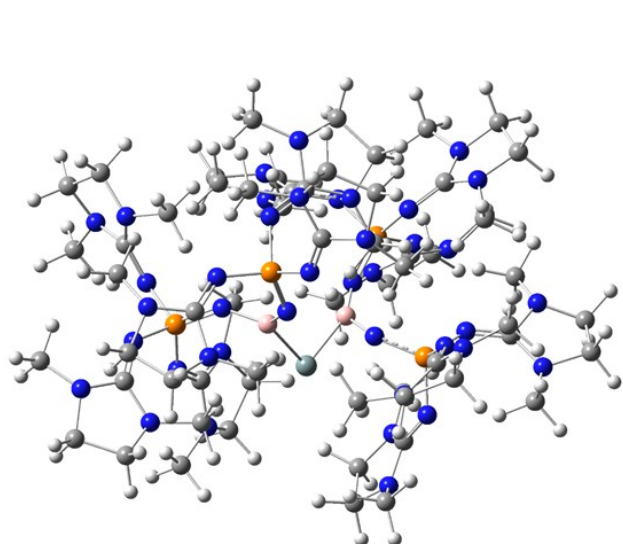

6

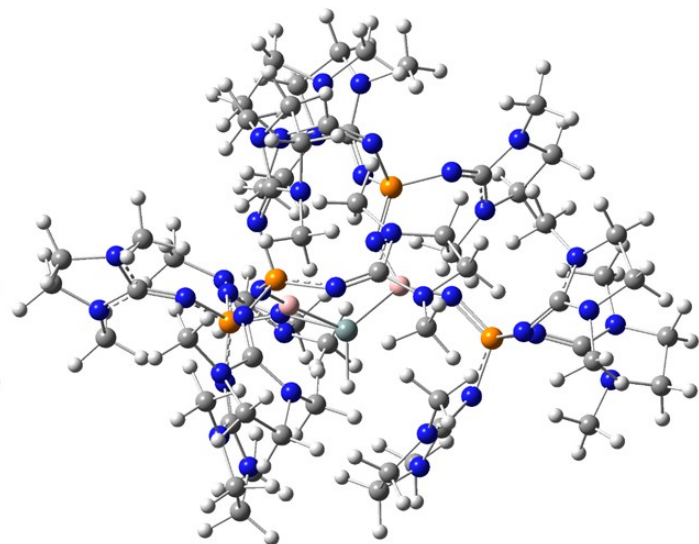

6H<sup>+</sup>

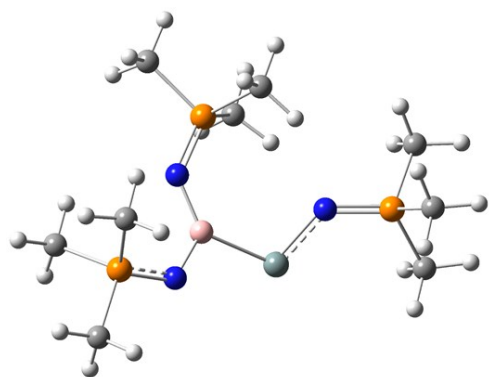

7

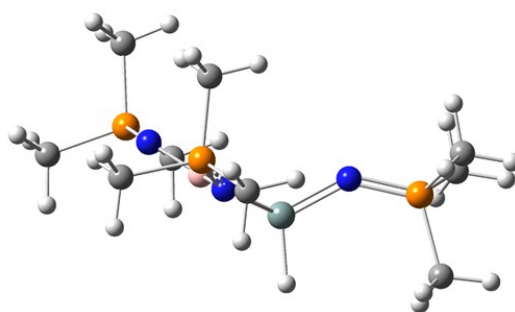

7H<sup>+</sup>

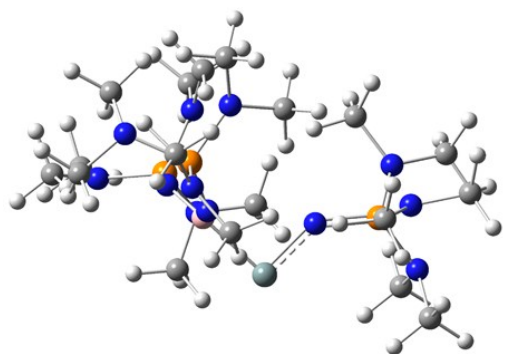

8

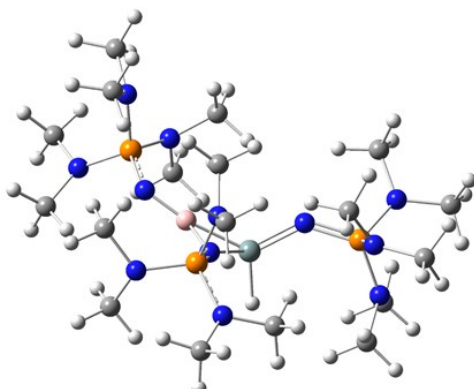

8H<sup>+</sup>

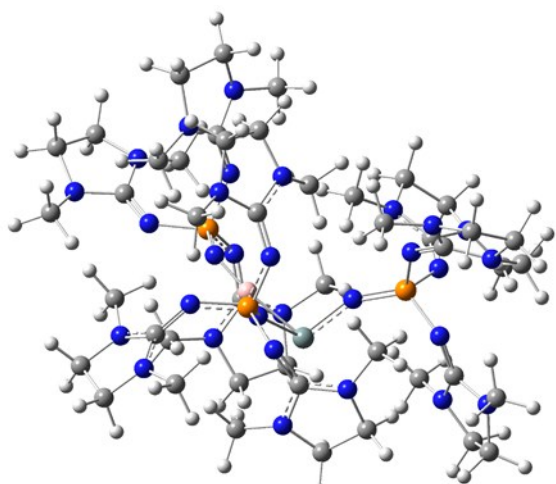

9

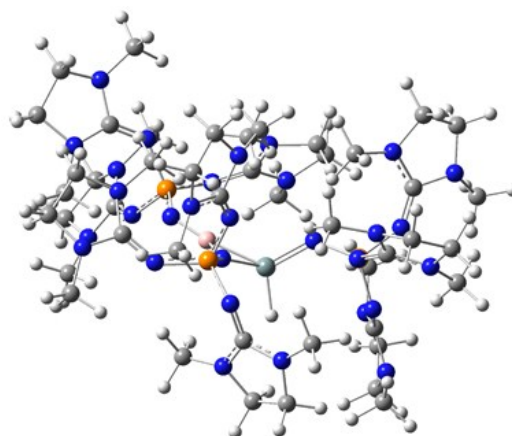

9H<sup>+</sup>

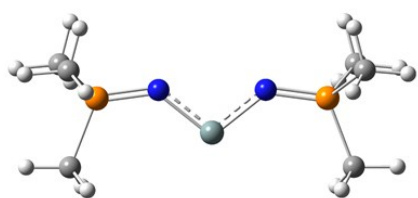

10

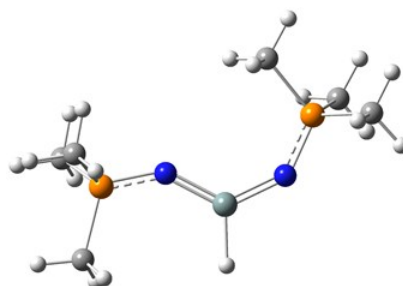

10H<sup>+</sup>

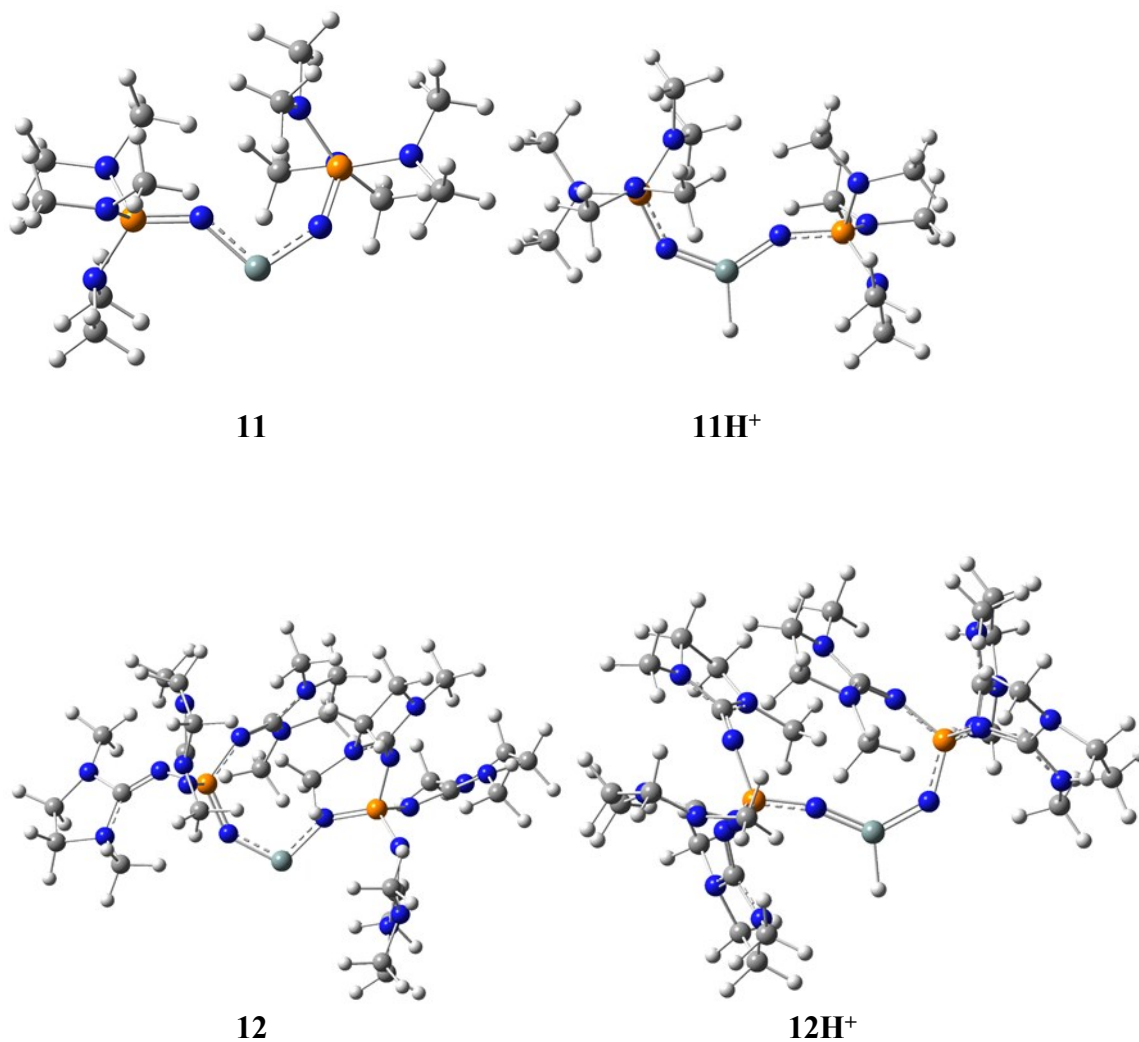

**Figure S1:** Optimized geometries of neutral and protonated compounds 1-12 at B3LYP-D3/6-31G(2d,p) level of theory.

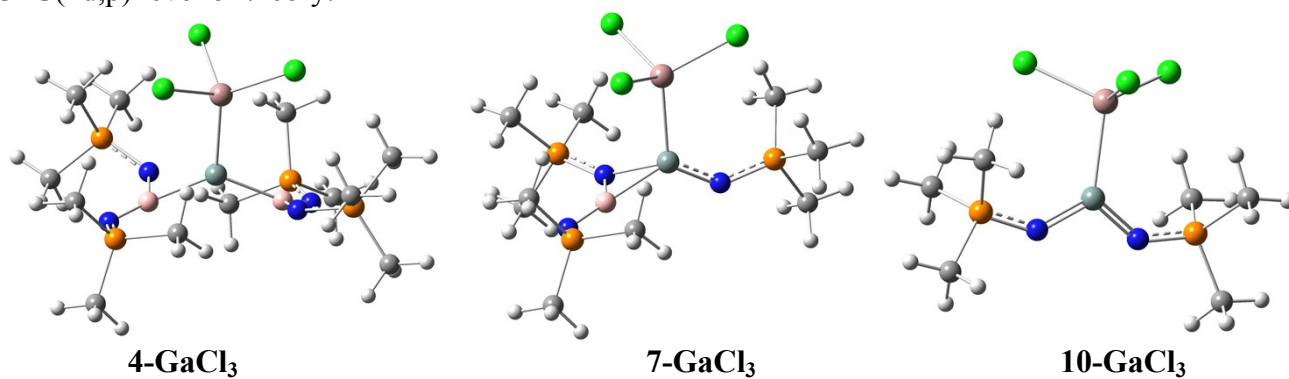

**Figure S2:** Optimized structure of complexes 4, 7 and 10 with GaCl<sub>3</sub> at BP86/def2-SVP level of theory in gas phase. (green = Cl; blue = N; white = H; light gray = C; grey = Si; Creamy (small sphere) = B, Creamy = Ga; Orange = P)

**Table TS1:** The complexation energies of 4, 7 and 10 with GaCl<sub>3</sub> calculated at BP86/def2-SVP level of theory in gas phase. (energies are given in kcal/mol.).

| Complexes            | Complexation energies ( $\Delta E$ ) |
|----------------------|--------------------------------------|
| 4-GaCl <sub>3</sub>  | -72.5                                |
| 7-GaCl <sub>3</sub>  | -73.3                                |
| 10-GaCl <sub>3</sub> | -53.8                                |

Energies are calculated using the equation  $\Delta E = E_{\text{complex}} - (E_{\text{indiv}} + E_{\text{GaCl}_3})$ , Where,  $E_{\text{complex}}$  is energy of complex,  $E_{\text{indiv}}$  and  $E_{\text{GaCl}_3}$  are energies of individual silylene (4, 7, and 10) and GaCl<sub>3</sub> respectively.

**B3LYP–D3/6–31G(2d,p) optimized Cartesian coordinates of all the neutral and protonated silylene molecules and the electronic energies at B3LYP–D3/6–311+G(2d,p) level of theory**

**1**

**E= -290.64253111 a.u.**

|    |            |             |             |
|----|------------|-------------|-------------|
| Si | 0.00000000 | 0.00000000  | 0.13312300  |
| H  | 0.00000000 | 1.09023100  | -0.93185900 |
| H  | 0.00000000 | -1.09023100 | -0.93185900 |

**1H<sup>+</sup>**

**E= -290.96424020 a.u.**

|    |             |             |            |
|----|-------------|-------------|------------|
| Si | 0.00000000  | 0.00000000  | 0.00000000 |
| H  | 0.00000000  | 1.46768400  | 0.00000000 |
| H  | 1.27105200  | -0.73384200 | 0.00000000 |
| H  | -1.27105200 | -0.73384200 | 0.00000000 |

**2**

**E= -329.98536465 a.u.**

|    |             |             |             |
|----|-------------|-------------|-------------|
| Si | 0.75456700  | -0.11449100 | -0.00000800 |
| H  | 0.96121300  | 1.40099600  | 0.00001100  |
| C  | -1.14998100 | 0.00297400  | -0.00002500 |
| H  | -1.48782100 | 0.57678400  | -0.87518700 |
| H  | -1.64988600 | -0.96881300 | -0.00029300 |
| H  | -1.48755700 | 0.57606800  | 0.87573100  |

**2H<sup>+</sup>**

**E= -330.33206061 a.u.**

|    |             |             |            |
|----|-------------|-------------|------------|
| Si | -0.00736900 | -0.63843600 | 0.00000000 |
| H  | 0.01578300  | -1.40852900 | 1.25178600 |
| C  | -0.00736900 | 1.18048800  | 0.00000000 |
| H  | 1.05256500  | 1.49634900  | 0.00000000 |

|   |             |             |             |
|---|-------------|-------------|-------------|
| H | -0.46837200 | 1.58794200  | -0.90539800 |
| H | -0.46837200 | 1.58794200  | 0.90539800  |
| H | 0.01578300  | -1.40852900 | -1.25178600 |

**3**

**E= -369.32879216 a.u.**

|    |             |             |             |
|----|-------------|-------------|-------------|
| Si | 0.00000000  | 0.00000000  | 0.76126800  |
| C  | 0.00000000  | 1.43616100  | -0.50113100 |
| H  | 0.25331500  | 2.40634600  | -0.06485000 |
| H  | 0.63665100  | 1.25010100  | -1.37505600 |
| H  | -1.03259400 | 1.51004500  | -0.88218700 |
| C  | 0.00000000  | -1.43616100 | -0.50113100 |
| H  | 1.03259400  | -1.51004500 | -0.88218700 |
| H  | -0.25331500 | -2.40634600 | -0.06485000 |
| H  | -0.63665100 | -1.25010100 | -1.37505600 |

**3H<sup>+</sup>**

**E= -369.69600439 a.u.**

|    |             |             |             |
|----|-------------|-------------|-------------|
| Si | 0.00000000  | 0.00000000  | 0.43662200  |
| C  | 0.00000000  | 1.62369800  | -0.39884700 |
| H  | 0.87773500  | 2.19686200  | -0.06473000 |
| H  | 0.00018700  | 1.54529700  | -1.48802400 |
| H  | -0.87795600 | 2.19670500  | -0.06503800 |
| C  | 0.00000000  | -1.62369800 | -0.39884700 |
| H  | 0.87795600  | -2.19670500 | -0.06503800 |
| H  | -0.87773500 | -2.19686200 | -0.06473000 |
| H  | -0.00018700 | -1.54529700 | -1.48802400 |
| H  | 0.00000000  | 0.00000000  | 1.90904100  |

**4**

**E= -2403.16241283 a.u.**

|   |             |             |             |
|---|-------------|-------------|-------------|
| B | 1.34426600  | -0.59324400 | -0.42663200 |
| B | -1.34706400 | 0.59832800  | -0.41914600 |
| N | 1.71319200  | -1.70736600 | 0.37756900  |
| N | 2.16194300  | 0.60794500  | -0.54248300 |
| N | -2.15896200 | -0.60788800 | -0.52978000 |
| N | -1.71554600 | 1.71199900  | 0.38486300  |
| P | 0.81441800  | -2.95560200 | 0.69963800  |
| P | 3.73260700  | 0.59830900  | -0.46475300 |
| P | -3.73019400 | -0.60386700 | -0.46278000 |
| P | -0.81505900 | 2.96158000  | 0.69800000  |
| C | 1.85579200  | -4.32911600 | 1.29813900  |
| H | 1.25055800  | -5.19528200 | 1.58025700  |
| C | -0.18850600 | -3.67616800 | -0.65049600 |
| H | -0.93201100 | -2.93023000 | -0.94564300 |
| C | -0.40861800 | -2.67762400 | 2.03061900  |
| H | -1.11681900 | -1.93016100 | 1.66057900  |
| C | 4.41710600  | 2.23370600  | -0.89134500 |
| H | 4.02697400  | 2.97916000  | -0.19403100 |
| C | 4.55364600  | -0.57029100 | -1.61079400 |
| H | 5.64428500  | -0.52049700 | -1.54368700 |

|    |             |             |             |
|----|-------------|-------------|-------------|
| C  | 4.45687000  | 0.18476500  | 1.16885500  |
| H  | 5.55006300  | 0.13527700  | 1.14051800  |
| C  | -4.46479800 | -0.17862600 | 1.16293300  |
| H  | -4.04576300 | 0.78942500  | 1.44776500  |
| C  | -4.40626800 | -2.24508300 | -0.88020000 |
| H  | -5.49925400 | -2.24871600 | -0.84098900 |
| C  | -4.54731900 | 0.55237100  | -1.62396100 |
| H  | -5.63820400 | 0.49918600  | -1.56401800 |
| C  | 0.18706500  | 3.67248000  | -0.65760900 |
| H  | 0.93016100  | 2.92423000  | -0.94826500 |
| C  | -1.85410500 | 4.33930300  | 1.29070800  |
| H  | -2.42769800 | 4.00599200  | 2.15890400  |
| C  | 0.40962700  | 2.68913800  | 2.02854300  |
| H  | 1.11658800  | 1.93915600  | 1.66128500  |
| H  | -1.24765800 | 5.20645200  | 1.56711100  |
| H  | -2.55334500 | 4.62442800  | 0.50059300  |
| H  | -0.45609400 | 3.88752300  | -1.51416300 |
| H  | 0.68797300  | 4.59057900  | -0.33407300 |
| H  | -4.21139600 | 1.56163200  | -1.37385000 |
| H  | -4.22142500 | 0.31913700  | -2.64068000 |
| H  | -4.07685800 | -2.51640200 | -1.88603500 |
| H  | -4.01747700 | -2.98359900 | -0.17479900 |
| H  | -5.55780700 | -0.12999200 | 1.12738500  |
| H  | -4.15790200 | -0.92340200 | 1.90212000  |
| H  | 2.43053700  | -3.99067200 | 2.16358100  |
| H  | 2.55394100  | -4.61792500 | 0.50840000  |
| H  | 0.45425000  | -3.89665400 | -1.50597300 |
| H  | -0.68886200 | -4.59231900 | -0.32062500 |
| H  | -0.94244900 | -3.59656600 | 2.29267800  |
| H  | 0.10138900  | -2.28660100 | 2.91440000  |
| H  | 4.03563300  | -0.78091800 | 1.45829200  |
| H  | 4.14594200  | 0.93520500  | 1.90061700  |
| H  | 4.23589400  | -0.34423500 | -2.63169800 |
| H  | 4.21208800  | -1.57609000 | -1.35455500 |
| H  | 5.50986500  | 2.23380000  | -0.84599600 |
| H  | 4.09426400  | 2.49833600  | -1.90108500 |
| H  | 0.94485900  | 3.60881500  | 2.28504500  |
| H  | -0.09928900 | 2.30302700  | 2.91509700  |
| Si | -0.00820500 | -0.00105600 | -1.80790700 |

**4H<sup>+</sup>**

**E= -2403.64737320a.u.**

|   |             |             |             |
|---|-------------|-------------|-------------|
| B | 1.87687400  | -0.29315100 | -0.09896700 |
| B | -1.82480500 | -0.06428600 | -0.27844200 |
| N | 3.03546100  | -0.81851600 | 0.42281600  |
| N | 1.56486200  | 1.07737800  | -0.52216400 |
| N | -2.19791300 | -1.29233900 | -0.86649600 |
| N | -2.60043500 | 0.77899800  | 0.53516000  |
| P | 3.33991100  | -2.31456400 | 0.85878800  |
| P | 2.58731900  | 2.20188700  | -1.05710600 |
| P | -3.61796800 | -1.99741800 | -0.78736300 |

|    |             |             |             |
|----|-------------|-------------|-------------|
| P  | -2.35660700 | 2.15905800  | 1.23848200  |
| C  | 3.70244000  | -2.41545200 | 2.63755800  |
| H  | 3.99460300  | -3.42954800 | 2.92288000  |
| C  | 4.82837500  | -2.93789200 | 0.02296900  |
| H  | 4.64885500  | -2.97222100 | -1.05446300 |
| C  | 2.03940500  | -3.55258900 | 0.54673300  |
| H  | 1.82899200  | -3.59697200 | -0.52428200 |
| C  | 1.71000800  | 3.73164900  | -1.47550000 |
| H  | 1.21259900  | 4.12175400  | -0.58463100 |
| C  | 3.47770400  | 1.68608000  | -2.55413800 |
| H  | 4.15306000  | 2.47265900  | -2.90089600 |
| C  | 3.84034300  | 2.57655200  | 0.19692800  |
| H  | 4.59702100  | 3.26277500  | -0.19232800 |
| C  | -4.17692000 | -2.42605400 | 0.89716800  |
| H  | -4.22242200 | -1.50378900 | 1.48045200  |
| C  | -3.57872100 | -3.56221900 | -1.70764900 |
| H  | -4.54789500 | -4.06672100 | -1.67321400 |
| C  | -4.98619000 | -1.03068900 | -1.50980700 |
| H  | -5.93537900 | -1.57047500 | -1.45089700 |
| C  | -2.36481400 | 3.60229300  | 0.11412500  |
| H  | -1.53578900 | 3.50685200  | -0.59193700 |
| C  | -3.68401500 | 2.49643000  | 2.43316700  |
| H  | -3.69286900 | 1.70688100  | 3.18846600  |
| C  | -0.80807800 | 2.32962400  | 2.19965300  |
| H  | 0.04362600  | 2.14747100  | 1.53890700  |
| H  | -3.54302200 | 3.46396100  | 2.92250300  |
| H  | -4.64397200 | 2.49074900  | 1.91162600  |
| H  | -3.29961300 | 3.60528900  | -0.45175900 |
| H  | -2.27098200 | 4.54477400  | 0.66115000  |
| H  | -5.05986900 | -0.08893900 | -0.96151900 |
| H  | -4.75617500 | -0.81364200 | -2.55578000 |
| H  | -3.31218100 | -3.35633000 | -2.74698600 |
| H  | -2.81540100 | -4.21304000 | -1.27463900 |
| H  | -5.15792600 | -2.90924800 | 0.88573200  |
| H  | -3.44819100 | -3.09867600 | 1.35633900  |
| H  | 2.81344900  | -2.12303100 | 3.20180100  |
| H  | 4.51297000  | -1.72340500 | 2.87769100  |
| H  | 5.66075100  | -2.25829900 | 0.22024400  |
| H  | 5.08726400  | -3.93901500 | 0.37747200  |
| H  | 2.35741000  | -4.53821500 | 0.89733000  |
| H  | 1.12453700  | -3.25729800 | 1.06530400  |
| H  | 4.29961800  | 1.62869800  | 0.48968800  |
| H  | 3.35838200  | 3.01935500  | 1.07159900  |
| H  | 2.75494000  | 1.45218400  | -3.33980900 |
| H  | 4.05222400  | 0.78615300  | -2.32201900 |
| H  | 2.40748100  | 4.48172900  | -1.85734400 |
| H  | 0.96012000  | 3.51774100  | -2.24142600 |
| H  | -0.72438100 | 3.32295100  | 2.65015200  |
| H  | -0.79860200 | 1.57577200  | 2.99114800  |
| Si | 0.10896400  | -0.10735500 | -0.94721300 |
| H  | 0.21005800  | -0.29820800 | -2.42300300 |



5

E = -3539.52911587 a.u.

|    |             |             |             |
|----|-------------|-------------|-------------|
| N  | -0.76231600 | -1.13745600 | 0.45895200  |
| N  | -2.26107200 | 0.67134500  | -0.43514900 |
| N  | 2.23619200  | 1.41657400  | 0.29016400  |
| N  | 1.85256700  | -0.56619700 | -1.27711700 |
| P  | -1.08989600 | -1.95058500 | 1.71157300  |
| P  | -3.61321600 | 0.64797700  | -1.16911400 |
| P  | 1.87533400  | 2.85799600  | 0.77819700  |
| P  | 3.01834300  | -1.59458500 | -1.30571700 |
| N  | 2.39281000  | -3.15721900 | -1.26840400 |
| N  | 4.12114900  | -1.61091200 | -0.04289100 |
| N  | 3.99882900  | -1.35282000 | -2.64095500 |
| N  | -3.58851600 | 1.17516500  | -2.77431200 |
| N  | -4.73669100 | 1.55579000  | -0.29195300 |
| N  | -4.41180400 | -0.83384700 | -1.37357500 |
| N  | -2.67185500 | -1.81952100 | 2.33197800  |
| N  | -0.97247100 | -3.63514500 | 1.56700700  |
| N  | 0.00628800  | -1.62922200 | 2.95707800  |
| N  | 0.30141600  | 3.40980200  | 0.93645100  |
| N  | 2.42817100  | 3.00127700  | 2.36281800  |
| N  | 2.53956500  | 4.01999900  | -0.23456300 |
| B  | -1.06979700 | -0.15438500 | -0.52362900 |
| B  | 1.54713800  | 0.73821500  | -0.73131000 |
| Si | 0.16417700  | 0.32555300  | -2.09544000 |
| C  | -0.54764400 | 2.86336300  | 1.99608700  |
| H  | -1.02389400 | 1.92683000  | 1.68259300  |
| H  | 0.03760900  | 2.68407400  | 2.89673000  |
| H  | -1.33488500 | 3.59113900  | 2.22932600  |
| C  | 3.59074200  | 3.68167400  | -1.18273500 |
| H  | 4.56329100  | 4.08834700  | -0.86541900 |
| H  | 3.67077900  | 2.60017400  | -1.27425100 |
| H  | 3.35392700  | 4.10056700  | -2.16986800 |
| C  | 2.34231500  | 5.44984400  | -0.06344800 |
| H  | 3.22710800  | 5.93805300  | 0.37209600  |
| H  | 2.14696200  | 5.91919000  | -1.03714700 |
| H  | 1.48423500  | 5.64324300  | 0.57922900  |
| C  | 3.60632500  | -1.98919500 | 1.27627400  |
| H  | 4.43377900  | -2.36089000 | 1.89215800  |
| H  | 3.14206900  | -1.13583400 | 1.78247100  |
| H  | 2.85824500  | -2.77352900 | 1.17682300  |
| C  | 5.06396100  | -0.48894000 | 0.04138900  |
| H  | 5.87426000  | -0.76271400 | 0.72653800  |
| H  | 5.49700000  | -0.28245400 | -0.93729300 |
| H  | 4.56889300  | 0.42074300  | 0.40396500  |
| C  | 3.59033800  | -0.49449400 | -3.74580100 |
| H  | 2.67302400  | 0.03974700  | -3.49876000 |
| H  | 4.38078900  | 0.23769000  | -3.96392900 |
| H  | 3.41492100  | -1.08341900 | -4.65720300 |
| C  | 3.28942900  | -4.30248200 | -1.37182600 |
| H  | 2.79441900  | -5.18214400 | -0.94382600 |
| H  | 3.56353400  | -4.54209900 | -2.41072100 |
| H  | 4.20127300  | -4.11874700 | -0.80126700 |

|   |             |             |             |
|---|-------------|-------------|-------------|
| C | 1.09826700  | -3.36436400 | -1.92612700 |
| H | 0.73047000  | -4.35919800 | -1.65277100 |
| H | 0.38292500  | -2.61908100 | -1.57961600 |
| H | 1.16969100  | -3.32115900 | -3.02305800 |
| C | 0.73251800  | -0.36981800 | 2.96865200  |
| H | 0.18697600  | 0.41778200  | 3.51081100  |
| H | 1.69657300  | -0.50746600 | 3.47531700  |
| H | 0.91940100  | -0.03102500 | 1.95123700  |
| C | -0.25158100 | -2.17065000 | 4.28139000  |
| H | -0.71783900 | -3.15479300 | 4.20882100  |
| H | 0.69644900  | -2.28686500 | 4.82223000  |
| H | -0.90252600 | -1.52024800 | 4.88752900  |
| C | -1.83430300 | -4.22687000 | 0.54438200  |
| H | -2.82459400 | -3.77020500 | 0.57277200  |
| H | -1.42795400 | -4.09674700 | -0.46874000 |
| H | -1.94513100 | -5.30051900 | 0.73804700  |
| C | 0.35527400  | -4.24587200 | 1.59104200  |
| H | 0.24259600  | -5.32698400 | 1.73638600  |
| H | 0.91810500  | -4.07468100 | 0.66461200  |
| H | 0.93851000  | -3.84372100 | 2.41853800  |
| C | -4.63184400 | 0.92475900  | -3.75682900 |
| H | -5.25519300 | 0.08765100  | -3.44625700 |
| H | -5.27586700 | 1.80563700  | -3.90544700 |
| H | -4.17670900 | 0.67975000  | -4.72626400 |
| C | -2.73685500 | 2.29949600  | -3.13219100 |
| H | -1.94413900 | 2.42181500  | -2.39730000 |
| H | -2.25762600 | 2.11580200  | -4.10088300 |
| H | -3.31149500 | 3.23786800  | -3.20029200 |
| C | -6.01295600 | 1.87342800  | -0.91295000 |
| H | -5.96736600 | 2.77675200  | -1.54252600 |
| H | -6.35190900 | 1.03900000  | -1.52894300 |
| H | -6.76699300 | 2.04602300  | -0.13496500 |
| C | -4.28290200 | 2.56037400  | 0.65594400  |
| H | -4.99869700 | 2.63922600  | 1.48498100  |
| H | -3.30945300 | 2.27619400  | 1.04955600  |
| H | -4.19248900 | 3.55718300  | 0.19407900  |
| C | -5.06953300 | -1.43508000 | -0.21500000 |
| H | -5.63811700 | -0.67944400 | 0.32697800  |
| H | -5.76346600 | -2.20953600 | -0.56420800 |
| H | -4.35029000 | -1.89323200 | 0.47810000  |
| C | -3.64601600 | -1.82454300 | -2.13811700 |
| H | -2.87347600 | -2.30493500 | -1.52198400 |
| H | -4.32707700 | -2.59633600 | -2.51608900 |
| H | -3.14886100 | -1.34955600 | -2.98470800 |
| C | 2.38085600  | 4.28474600  | 3.04634600  |
| H | 2.30499100  | 4.12008700  | 4.12824900  |
| H | 3.27968100  | 4.89418100  | 2.86286300  |
| H | 1.50403800  | 4.85169600  | 2.73171000  |
| C | 3.46734200  | 2.11487100  | 2.86587300  |
| H | 3.40827800  | 1.16053400  | 2.34795200  |
| H | 4.47719600  | 2.53337900  | 2.72704700  |
| H | 3.31664500  | 1.95117600  | 3.94089800  |
| C | -3.12732700 | -0.45207500 | 2.55778300  |

|   |             |             |             |
|---|-------------|-------------|-------------|
| H | -2.72534000 | 0.19742400  | 1.78017800  |
| H | -4.22091200 | -0.40994200 | 2.49030100  |
| H | -2.83590400 | -0.07932600 | 3.55396300  |
| C | -3.29921800 | -2.77854100 | 3.23038200  |
| H | -4.37410100 | -2.83697600 | 3.00950500  |
| H | -2.86239100 | -3.76753300 | 3.09760500  |
| H | -3.19422900 | -2.49143200 | 4.28811800  |
| C | 5.20541300  | -2.12191900 | -2.90057800 |
| H | 5.06125500  | -2.85244100 | -3.70972800 |
| H | 6.01994300  | -1.44858700 | -3.20235500 |
| H | 5.52509300  | -2.65086900 | -2.00274100 |
| C | -0.47762000 | 3.73374900  | -0.26383100 |
| H | -1.08552400 | 4.62893300  | -0.07339800 |
| H | 0.18055600  | 3.92502400  | -1.11018100 |
| H | -1.14042600 | 2.90075700  | -0.51676300 |

**5H<sup>+</sup>**

**E = -3540.02809742 a.u.**

|    |             |             |             |
|----|-------------|-------------|-------------|
| N  | 0.95243200  | 0.82369600  | 0.95404500  |
| N  | 2.57682900  | -0.75079900 | -0.16232700 |
| N  | -3.34010300 | -0.65042000 | -0.20700300 |
| N  | -1.54948900 | 0.86363000  | -1.28730900 |
| P  | 1.89670200  | 1.36005900  | 2.09254800  |
| P  | 3.35106100  | -1.61309100 | -1.19887300 |
| P  | -3.70937200 | -1.94391900 | 0.61005500  |
| P  | -1.85562100 | 2.41584500  | -1.56805400 |
| N  | -0.57578700 | 3.41994400  | -1.27126700 |
| N  | -3.14904300 | 2.87370300  | -0.65689900 |
| N  | -2.15966100 | 2.62556900  | -3.17413900 |
| N  | 4.09785400  | -0.69481300 | -2.37300300 |
| N  | 2.39689900  | -2.76651700 | -1.95762200 |
| N  | 4.65594400  | -2.44467900 | -0.54377900 |
| N  | 2.51715400  | 0.15087600  | 3.06433100  |
| N  | 3.25338200  | 2.27815100  | 1.70988900  |
| N  | 1.00269500  | 2.47583700  | 2.99042500  |
| N  | -2.99868500 | -3.39777500 | 0.17835400  |
| N  | -3.37139400 | -1.69710500 | 2.22454000  |
| N  | -5.32479100 | -2.24778600 | 0.41732600  |
| B  | 1.33247100  | -0.09218400 | -0.06125200 |
| B  | -2.13028200 | -0.35296400 | -0.76916900 |
| Si | -0.23821700 | -0.44058300 | -1.32776500 |
| C  | -1.80316800 | -3.88263000 | 0.85908400  |
| H  | -0.89072800 | -3.39608500 | 0.49191800  |
| H  | -1.87725900 | -3.72005500 | 1.93393300  |
| H  | -1.71096500 | -4.96128600 | 0.68998300  |
| C  | -6.26741900 | -1.14231600 | 0.26792300  |
| H  | -6.86736700 | -1.00664300 | 1.17812700  |
| H  | -5.72459700 | -0.22351200 | 0.05010400  |
| H  | -6.95126000 | -1.35035200 | -0.56376200 |
| C  | -5.95654200 | -3.54886500 | 0.59800700  |
| H  | -6.64580600 | -3.53987800 | 1.45365400  |
| H  | -6.53846000 | -3.81085100 | -0.29460700 |
| H  | -5.20250400 | -4.31772100 | 0.76055900  |

|   |             |             |             |
|---|-------------|-------------|-------------|
| C | -3.32674100 | 2.43953700  | 0.72803600  |
| H | -3.19425900 | 3.28181500  | 1.41968400  |
| H | -4.33032600 | 2.02400800  | 0.85933800  |
| H | -2.61299800 | 1.65905000  | 0.97583900  |
| C | -4.02382100 | 3.96934100  | -1.05956600 |
| H | -3.80013500 | 4.89232500  | -0.50744500 |
| H | -3.92743300 | 4.16998700  | -2.12618900 |
| H | -5.06492100 | 3.69416300  | -0.85802400 |
| C | -2.95843600 | 1.63882000  | -3.90044500 |
| H | -3.07922000 | 0.73390100  | -3.30580100 |
| H | -3.95188900 | 2.03934500  | -4.13904200 |
| H | -2.45675400 | 1.37506300  | -4.83809400 |
| C | -0.45512400 | 4.14189200  | -0.00348600 |
| H | 0.03301900  | 3.53230500  | 0.76339700  |
| H | 0.14409200  | 5.04307000  | -0.17304200 |
| H | -1.43559000 | 4.45727500  | 0.35236400  |
| C | 0.71642900  | 3.11612000  | -1.89300300 |
| H | 1.33896300  | 2.52524500  | -1.21325600 |
| H | 0.56987600  | 2.55637400  | -2.81878700 |
| H | 1.23356400  | 4.05153300  | -2.13554300 |
| C | -0.41008300 | 2.17879300  | 3.20880400  |
| H | -0.56759600 | 1.51745500  | 4.07565200  |
| H | -0.95294800 | 3.11266800  | 3.39641700  |
| H | -0.81506900 | 1.69984300  | 2.32093300  |
| C | 1.61545000  | 3.12699700  | 4.14731900  |
| H | 2.64730800  | 3.40417700  | 3.93134100  |
| H | 1.05841300  | 4.04103100  | 4.38051700  |
| H | 1.60194400  | 2.48741400  | 5.04255000  |
| C | 4.42948400  | 1.59602600  | 1.17206700  |
| H | 4.49043800  | 0.58433300  | 1.56228600  |
| H | 4.38735500  | 1.52017200  | 0.07743400  |
| H | 5.33144900  | 2.15060500  | 1.45682300  |
| C | 3.09276800  | 3.61686100  | 1.14792000  |
| H | 3.96952600  | 4.22350700  | 1.40298000  |
| H | 3.00897200  | 3.59214100  | 0.05158100  |
| H | 2.20560000  | 4.10037500  | 1.55311100  |
| C | 5.30866300  | -1.06830900 | -3.09473000 |
| H | 5.72788200  | -1.98339900 | -2.67991900 |
| H | 5.10261200  | -1.22593400 | -4.16280000 |
| H | 6.05751200  | -0.26945500 | -3.01556000 |
| C | 3.41464800  | 0.46188900  | -2.93261100 |
| H | 2.58060400  | 0.75305000  | -2.29544900 |
| H | 4.10899100  | 1.30917800  | -3.00121200 |
| H | 3.02817100  | 0.25537500  | -3.94058800 |
| C | 2.77320300  | -3.40080500 | -3.21263000 |
| H | 1.87276700  | -3.58987500 | -3.80867600 |
| H | 3.42599100  | -2.74990300 | -3.79251600 |
| H | 3.28561300  | -4.36237100 | -3.05883900 |
| C | 1.37048600  | -3.48792300 | -1.21709300 |
| H | 1.64194100  | -4.54249800 | -1.06318200 |
| H | 1.22462600  | -3.02593700 | -0.24043900 |
| H | 0.41789500  | -3.46473900 | -1.76265400 |
| C | 4.47979200  | -3.79617400 | -0.02472900 |

|   |             |             |             |
|---|-------------|-------------|-------------|
| H | 3.88715500  | -4.40102900 | -0.71018900 |
| H | 5.46261600  | -4.26987200 | 0.07029400  |
| H | 4.00149500  | -3.81239200 | 0.96709300  |
| C | 5.62815000  | -1.66627700 | 0.21926200  |
| H | 5.34053000  | -1.57229100 | 1.27653600  |
| H | 6.60824400  | -2.15434500 | 0.17161700  |
| H | 5.72118600  | -0.66476400 | -0.20259200 |
| C | -4.04603200 | -2.44170900 | 3.27892600  |
| H | -3.44689700 | -3.29108100 | 3.63908000  |
| H | -4.23401900 | -1.77870800 | 4.13156000  |
| H | -5.00654800 | -2.82019100 | 2.93154900  |
| C | -2.16234300 | -1.01005100 | 2.66417400  |
| H | -1.65586500 | -0.52870100 | 1.82826400  |
| H | -2.41609600 | -0.24291500 | 3.40629600  |
| H | -1.45029500 | -1.70575300 | 3.13123700  |
| C | 2.04052100  | -1.22245700 | 2.99242600  |
| H | 1.16556000  | -1.28571900 | 2.34841800  |
| H | 2.81432100  | -1.88589400 | 2.58466900  |
| H | 1.76570600  | -1.57647200 | 3.99484100  |
| C | 3.53863300  | 0.36753300  | 4.08034300  |
| H | 4.38556600  | -0.31433900 | 3.92032200  |
| H | 3.91724300  | 1.38758900  | 4.03449500  |
| H | 3.14380100  | 0.18221900  | 5.08812500  |
| C | -1.91414500 | 3.86096200  | -3.91310800 |
| H | -1.31894200 | 3.64720100  | -4.80868300 |
| H | -2.85733100 | 4.32061500  | -4.23629300 |
| H | -1.37164300 | 4.57079000  | -3.29056900 |
| C | -3.06654500 | -3.77632600 | -1.23378100 |
| H | -3.07366200 | -4.86865200 | -1.32142400 |
| H | -3.98557600 | -3.39031900 | -1.67898500 |
| H | -2.21461400 | -3.37899900 | -1.80177100 |
| H | 0.00696500  | -0.75793600 | -2.76692300 |

**6**

**E = -6255.31991863 a.u.**

|   |             |             |             |
|---|-------------|-------------|-------------|
| N | -1.69385900 | 1.52822000  | 0.05800600  |
| N | -2.52249700 | -0.83516200 | 0.19014600  |
| N | 2.04459100  | -1.54103100 | 0.08698200  |
| N | 1.48472700  | 0.73452600  | 1.25884700  |
| P | -2.41822500 | 2.04849300  | -1.22859000 |
| P | -3.44416600 | -1.95565300 | 0.71399100  |
| P | 3.02001000  | -1.84963800 | -1.06852000 |
| P | 2.55240900  | 1.74219000  | 1.84344100  |
| N | 2.38637700  | 3.29067900  | 1.29269600  |
| N | 4.08354500  | 1.35777000  | 1.33466000  |
| N | 2.49532400  | 1.82839500  | 3.48999100  |
| N | -3.07518200 | -2.66179800 | 2.16152200  |
| N | -3.64840300 | -3.23726800 | -0.33491100 |
| N | -5.04389600 | -1.51065100 | 0.94644200  |
| N | -2.02135200 | 1.35582400  | -2.68688300 |
| N | -4.07518400 | 1.89552400  | -1.26222800 |
| N | -2.03099400 | 3.67080700  | -1.41282400 |
| N | 2.48849500  | -3.08603100 | -2.03632200 |

|   |             |             |             |
|---|-------------|-------------|-------------|
| N | 3.39113400  | -0.52135100 | -1.99628700 |
| N | 4.52215700  | -2.40293600 | -0.61323000 |
| B | -1.63456200 | 0.21014200  | 0.61008100  |
| B | 1.31446900  | -0.63770800 | 0.84698000  |
| C | -1.97337900 | 4.38887900  | -2.47240300 |
| C | -2.25127000 | 5.39135100  | -4.56816100 |
| C | -1.00782400 | 5.97153100  | -3.89549200 |
| H | -2.06853700 | 5.07157800  | -5.59939800 |
| H | -3.08027200 | 6.11772900  | -4.57917800 |
| H | -0.08649100 | 5.54158400  | -4.32509900 |
| H | -0.94441900 | 7.06125500  | -3.97959300 |
| N | -2.57372100 | 4.26097400  | -3.71493700 |
| N | -1.17976900 | 5.54215900  | -2.52086100 |
| C | -4.98700700 | 2.21026800  | -0.42054900 |
| C | -6.28981600 | 3.20300400  | 1.23469900  |
| C | -7.13027900 | 2.14878500  | 0.51252200  |
| H | -6.37553700 | 3.14893800  | 2.32511300  |
| H | -6.56715900 | 4.22364900  | 0.92221800  |
| H | -7.24462200 | 1.23867000  | 1.11678800  |
| H | -8.12460600 | 2.51708900  | 0.23860700  |
| C | -0.91727700 | 1.43052700  | -3.34532700 |
| C | 0.47226600  | 0.90587700  | -5.15985200 |
| C | 1.27698500  | 1.69111700  | -4.11546000 |
| H | 0.73217000  | -0.16590200 | -5.14098700 |
| H | 0.62234500  | 1.27322100  | -6.18069000 |
| H | 2.19583600  | 1.17991800  | -3.81843300 |
| H | 1.54202900  | 2.69712400  | -4.47754500 |
| N | -4.94176400 | 2.87259400  | 0.80081300  |
| N | -6.31922300 | 1.89336300  | -0.66742500 |
| N | 0.35818800  | 1.77491700  | -2.99180600 |
| N | -0.88911900 | 1.12626700  | -4.71324700 |
| C | 1.30776100  | -3.52146700 | -2.31238800 |
| C | -0.31379600 | -5.15712900 | -2.70985200 |
| C | -0.95200000 | -3.76904300 | -2.82130000 |
| H | -0.57983700 | -5.81720700 | -3.54162900 |
| H | -0.61095400 | -5.65227800 | -1.77239400 |
| H | -1.19862100 | -3.51292400 | -3.86464200 |
| H | -1.85507300 | -3.67115600 | -2.22127500 |
| C | 4.94098300  | -3.48857800 | -0.09111900 |
| C | 5.22374000  | -5.49470800 | 1.06669900  |
| C | 6.51032100  | -5.17589900 | 0.30326600  |
| H | 5.34276800  | -5.31354300 | 2.14728500  |
| H | 4.89115100  | -6.52878500 | 0.93169100  |
| H | 7.41144500  | -5.31744200 | 0.90841700  |
| H | 6.60411900  | -5.80255000 | -0.60017500 |
| C | 4.41641800  | -0.20691800 | -2.69922100 |
| C | 6.19543600  | -0.17643000 | -4.21159200 |
| C | 6.06285400  | 1.20712300  | -3.57250000 |
| H | 7.22479600  | -0.54889400 | -4.21799900 |
| H | 5.83011900  | -0.17338600 | -5.25144700 |
| H | 6.86256800  | 1.39116800  | -2.83665500 |
| H | 6.09095400  | 2.01795200  | -4.30780500 |
| C | 5.22759100  | 1.90991400  | 1.50437500  |

|   |             |             |             |
|---|-------------|-------------|-------------|
| C | 7.04844800  | 3.28203400  | 2.00891200  |
| C | 7.55967200  | 2.01083200  | 1.33257100  |
| H | 7.08028200  | 4.14451700  | 1.32302500  |
| H | 7.60990600  | 3.54453400  | 2.91105400  |
| H | 8.30675100  | 2.20618100  | 0.55695700  |
| H | 8.00120900  | 1.31721500  | 2.06852900  |
| C | 2.20365300  | 0.88736400  | 4.33477700  |
| C | 1.80333100  | -1.17529100 | 5.34401600  |
| C | 1.04576600  | -0.07650700 | 6.11757600  |
| H | 1.10077900  | -1.85228600 | 4.84125500  |
| H | 2.48013300  | -1.76032300 | 5.97988000  |
| H | -0.03771400 | -0.17247300 | 5.95593300  |
| H | 1.24452400  | -0.09679700 | 7.19569800  |
| C | 1.58735900  | 4.26289200  | 1.54158700  |
| C | -0.18741600 | 5.64627300  | 2.11892200  |
| C | 0.96008700  | 6.51300600  | 1.59678000  |
| H | -0.99276100 | 5.55515100  | 1.37490700  |
| H | -0.61936700 | 6.02428500  | 3.05023100  |
| H | 0.62883200  | 7.27204100  | 0.88182300  |
| H | 1.49071100  | 7.02261000  | 2.41908400  |
| C | -5.64791600 | -1.00820400 | 1.94965500  |
| C | -7.48622000 | -0.64988200 | 3.34539600  |
| C | -6.29671200 | 0.16534900  | 3.85247500  |
| H | -8.42344200 | -0.08385400 | 3.34225800  |
| H | -7.63370200 | -1.55919700 | 3.95266300  |
| H | -6.41965100 | 1.23411600  | 3.61232600  |
| H | -6.14556900 | 0.07626700  | 4.93248900  |
| C | -2.04110000 | -3.23477800 | 2.65790300  |
| C | -0.73962600 | -4.15171100 | 4.37479000  |
| C | 0.04992700  | -4.16607100 | 3.05976400  |
| H | -0.16078800 | -3.74199500 | 5.21006100  |
| H | -1.07820100 | -5.16349800 | 4.65908800  |
| H | 0.80094900  | -3.36378000 | 3.03109500  |
| H | 0.54326100  | -5.12490700 | 2.86910300  |
| C | -4.18556400 | -3.40474500 | -1.47951200 |
| C | -5.30285900 | -4.63148300 | -3.12194900 |
| C | -4.98066400 | -3.23729700 | -3.65928100 |
| H | -5.08702800 | -5.42878100 | -3.84032300 |
| H | -6.36340700 | -4.71277000 | -2.82798100 |
| H | -4.14044700 | -3.27165300 | -4.37298400 |
| H | -5.82925000 | -2.75912200 | -4.15788500 |
| N | 0.46184300  | 4.35661900  | 2.33039700  |
| N | 1.80362500  | 5.51704400  | 0.96890400  |
| N | -5.18266200 | -0.41148800 | 3.11347800  |
| N | -7.05339900 | -0.98183900 | 2.00116700  |
| N | -1.85196800 | -3.29661700 | 4.03142600  |
| N | -0.99014000 | -3.91038600 | 2.07526600  |
| N | 1.52979400  | 1.15355000  | 5.51353500  |
| N | 2.55328600  | -0.43061000 | 4.35170200  |
| N | 6.33713100  | 1.47279000  | 0.77213500  |
| N | 5.67846300  | 2.92240800  | 2.33465600  |
| N | 4.27416000  | -4.55356800 | 0.49332900  |
| N | 1.10865600  | -4.84841100 | -2.70108800 |

|    |             |             |             |
|----|-------------|-------------|-------------|
| N  | 0.09942600  | -2.89474100 | -2.32878900 |
| N  | -4.59492700 | -2.51148200 | -2.45661800 |
| N  | -4.43277800 | -4.69805900 | -1.96381300 |
| N  | 6.30929300  | -3.78358400 | -0.05108200 |
| N  | 5.33536300  | -1.00175600 | -3.37537000 |
| N  | 4.77609300  | 1.11842800  | -2.91044900 |
| Si | -0.21040100 | -0.26040600 | 2.04533100  |
| C  | -3.82276500 | 3.58030500  | -3.98523000 |
| H  | -3.74705700 | 3.04243300  | -4.93670400 |
| H  | -4.05940800 | 2.86590600  | -3.19999000 |
| H  | -4.64427100 | 4.30989000  | -4.06518600 |
| C  | -0.05372700 | 5.66736300  | -1.62544600 |
| H  | -0.24098900 | 5.05211000  | -0.74938300 |
| H  | 0.87941300  | 5.31788900  | -2.09335600 |
| H  | 0.08284400  | 6.71291300  | -1.32932000 |
| C  | -3.86100000 | 3.74191100  | 1.22097100  |
| H  | -3.97451900 | 3.92855000  | 2.29390700  |
| H  | -2.90684000 | 3.24491300  | 1.05730600  |
| H  | -3.86746700 | 4.70346000  | 0.68826300  |
| C  | -6.63212800 | 0.74648100  | -1.49890700 |
| H  | -6.31418600 | -0.19512300 | -1.03102000 |
| H  | -7.71187500 | 0.72627600  | -1.67543500 |
| H  | -6.11877800 | 0.85048100  | -2.45474700 |
| C  | -3.91293000 | 0.30908300  | 3.15822400  |
| H  | -3.80509400 | 0.73731400  | 4.15845000  |
| H  | -3.07676600 | -0.36438200 | 2.99049400  |
| H  | -3.88034700 | 1.11114900  | 2.41275300  |
| C  | -7.81176900 | -1.95074900 | 1.24279300  |
| H  | -8.79699700 | -1.54209400 | 0.99449400  |
| H  | -7.26301900 | -2.17172400 | 0.32685400  |
| H  | -7.95198300 | -2.88945500 | 1.80256400  |
| C  | -0.60635500 | -3.80637300 | 0.68002900  |
| H  | 0.00561000  | -2.92195300 | 0.48212600  |
| H  | -0.02954600 | -4.70222500 | 0.42052100  |
| H  | -1.50196900 | -3.78361000 | 0.06453200  |
| C  | -2.89767900 | -3.00221400 | 4.97219900  |
| H  | -3.35474000 | -3.92009200 | 5.37707600  |
| H  | -2.50200600 | -2.41648700 | 5.81109600  |
| H  | -3.66591900 | -2.42336900 | 4.45597200  |
| C  | -4.57797400 | -5.79738600 | -1.03670000 |
| H  | -5.61771100 | -5.90535600 | -0.68803300 |
| H  | -4.27444700 | -6.73361200 | -1.51717700 |
| H  | -3.94142200 | -5.60019600 | -0.17360000 |
| C  | -3.92379200 | -1.23634300 | -2.66580600 |
| H  | -3.01138200 | -1.37323100 | -3.26033300 |
| H  | -4.58832900 | -0.56155200 | -3.20784800 |
| H  | -3.64446300 | -0.78060400 | -1.71878700 |
| C  | 2.03638700  | -5.87250600 | -2.27941200 |
| H  | 1.70920300  | -6.35161800 | -1.34176100 |
| H  | 2.12343700  | -6.64903200 | -3.04744800 |
| H  | 3.00867800  | -5.40879300 | -2.11021500 |
| C  | -0.13299400 | -1.46622800 | -2.36521200 |
| H  | -0.54479500 | -1.19749700 | -3.34603100 |



|   |             |             |             |
|---|-------------|-------------|-------------|
| H | -0.85038900 | -1.17677000 | -1.59382100 |
| H | 0.79393400  | -0.92313500 | -2.20950900 |
| C | 7.20712600  | -3.17673500 | -1.00794500 |
| H | 7.36266300  | -3.82962800 | -1.88252400 |
| H | 6.76587400  | -2.23962700 | -1.34847700 |
| H | 8.18199700  | -2.98285200 | -0.54757900 |
| C | 2.97540600  | -4.45702000 | 1.13068600  |
| H | 3.08896100  | -4.36036200 | 2.22133000  |
| H | 2.42822200  | -3.58572800 | 0.76838400  |
| H | 2.39575600  | -5.36367600 | 0.92585900  |
| C | 4.89295700  | 3.87069300  | 3.09589800  |
| H | 3.97775200  | 3.40672400  | 3.45988500  |
| H | 5.48987800  | 4.18709900  | 3.95950100  |
| H | 4.63877800  | 4.75892500  | 2.50468500  |
| C | 6.35313400  | 0.14882900  | 0.19492500  |
| H | 6.72689600  | -0.60556100 | 0.90450600  |
| H | 5.34481200  | -0.13380900 | -0.09164200 |
| H | 6.99830600  | 0.13818700  | -0.69014200 |
| C | 5.02714000  | -2.32578200 | -3.88039100 |
| H | 4.25452500  | -2.80266200 | -3.27964700 |
| H | 4.67891800  | -2.27115400 | -4.92424800 |
| H | 5.93105200  | -2.94387100 | -3.85288100 |
| C | 4.39572100  | 2.16803200  | -1.98178800 |
| H | 3.91103100  | 2.99833700  | -2.50672200 |
| H | 3.71269200  | 1.76130500  | -1.24005500 |
| H | 5.28093100  | 2.54316500  | -1.45331200 |
| C | -1.97570100 | 0.43241600  | -5.35191000 |
| H | -2.06982100 | 0.75868800  | -6.39450600 |
| H | -1.83296800 | -0.66116100 | -5.34782500 |
| H | -2.89299200 | 0.66206700  | -4.80975800 |
| C | 0.89976200  | 2.05530400  | -1.67381800 |
| H | 0.12559300  | 2.01869400  | -0.91082500 |
| H | 1.64674100  | 1.30032000  | -1.42439600 |
| H | 1.37469200  | 3.04292000  | -1.65937400 |
| C | -0.41949600 | 3.21548000  | 2.56623200  |
| H | -0.87411400 | 2.85304000  | 1.63678300  |
| H | 0.13136700  | 2.39722000  | 3.01502900  |
| H | -1.19532700 | 3.52974200  | 3.27048800  |
| C | 3.07561100  | 5.88917700  | 0.40622300  |
| H | 3.60081900  | 4.97482700  | 0.12655700  |
| H | 2.92808300  | 6.51303700  | -0.48268700 |
| H | 3.69419000  | 6.45416500  | 1.12225800  |
| C | 3.32452900  | -1.15404500 | 3.37089400  |
| H | 2.67746600  | -1.73085100 | 2.70075000  |
| H | 3.91104700  | -0.46734600 | 2.76334900  |
| H | 4.00713000  | -1.83806200 | 3.89281300  |
| C | 0.77868800  | 2.36857700  | 5.70805200  |
| H | 1.19442600  | 3.14258100  | 5.06216700  |
| H | -0.28272400 | 2.22886100  | 5.45558300  |
| H | 0.85043400  | 2.68828300  | 6.75449900  |

**6H<sup>+</sup>**

**E = -6255.85706663 a.u.**

|   |            |            |            |
|---|------------|------------|------------|
| N | 1.16670900 | 1.32566800 | 0.18772100 |
|---|------------|------------|------------|

|   |             |             |             |
|---|-------------|-------------|-------------|
| N | 2.63114900  | -0.58222600 | -0.51121400 |
| N | -3.22055100 | -0.69180500 | 0.51551200  |
| N | -1.75534800 | 0.58250200  | -1.22368300 |
| P | 1.88938700  | 2.26689700  | 1.20738400  |
| P | 3.35683400  | -1.79951200 | -1.15513300 |
| P | -3.47026500 | -1.81230900 | 1.60131900  |
| P | -2.58650600 | 1.67885000  | -2.09443300 |
| N | -1.93093400 | 3.16679400  | -2.21275900 |
| N | -3.95257600 | 1.86863300  | -1.26248100 |
| N | -2.71953300 | 1.15700800  | -3.64155500 |
| N | 2.74448600  | -2.32842200 | -2.57150800 |
| N | 3.50161700  | -3.11560300 | -0.12570800 |
| N | 4.91506500  | -1.35527400 | -1.49420900 |
| N | 1.10664600  | 2.31163100  | 2.67186600  |
| N | 3.43090700  | 1.93072900  | 1.70690200  |
| N | 1.88155700  | 3.81737600  | 0.59657400  |
| N | -2.26209700 | -2.88825300 | 1.89048000  |
| N | -3.90009000 | -1.03745900 | 2.98967000  |
| N | -4.79046500 | -2.71672900 | 1.20478100  |
| B | 1.40577100  | 0.09562800  | -0.45322400 |
| B | -2.13762400 | -0.43146200 | -0.26855400 |
| C | 1.92464000  | 4.97194000  | 1.15387400  |
| C | 2.28823700  | 6.83483300  | 2.50792300  |
| C | 1.43072300  | 7.24861700  | 1.31451000  |
| H | 1.90531100  | 7.20528300  | 3.46298400  |
| H | 3.32568400  | 7.18616900  | 2.39261500  |
| H | 0.37075500  | 7.35495400  | 1.60015400  |
| H | 1.75827800  | 8.18601200  | 0.85563500  |
| N | 2.22919500  | 5.37694600  | 2.44857100  |
| N | 1.61463700  | 6.11793400  | 0.42434000  |
| C | 4.56381400  | 2.29545400  | 1.22330000  |
| C | 6.28081800  | 3.15379100  | -0.09727700 |
| C | 6.85951500  | 2.76816500  | 1.27290800  |
| H | 6.88224000  | 2.78251000  | -0.93101000 |
| H | 6.18466400  | 4.24547500  | -0.19907400 |
| H | 7.46489300  | 1.85004800  | 1.21464000  |
| H | 7.48117400  | 3.55675000  | 1.70697700  |
| C | 0.01000800  | 2.87361100  | 3.02889100  |
| C | -1.36887900 | 3.92350500  | 4.58796800  |
| C | -2.03140200 | 3.98630000  | 3.21107100  |
| H | -2.06384700 | 3.64853200  | 5.38640200  |
| H | -0.90246500 | 4.88727100  | 4.85224800  |
| H | -2.89605700 | 3.30949700  | 3.14352200  |
| H | -2.37110000 | 4.99299200  | 2.94700100  |
| N | 4.97800200  | 2.51022400  | -0.06706200 |
| N | 5.65287900  | 2.55790100  | 2.04877600  |
| N | -0.96875100 | 3.53929200  | 2.32194800  |
| N | -0.35824100 | 2.89969900  | 4.38138100  |
| C | -0.99697100 | -2.79793900 | 2.14548600  |
| C | 1.13500300  | -3.65731400 | 2.56894900  |
| C | 1.18717400  | -2.12659300 | 2.57489700  |
| H | 1.17932600  | -4.07057500 | 3.59075800  |
| H | 1.93654800  | -4.10369300 | 1.97804900  |

|   |             |             |             |
|---|-------------|-------------|-------------|
| H | 1.71336700  | -1.71695900 | 3.44203400  |
| H | 1.65496100  | -1.73139500 | 1.66481000  |
| C | -4.96615700 | -3.86030300 | 0.66038000  |
| C | -4.82701400 | -5.84943100 | -0.55407900 |
| C | -6.06521600 | -5.89443100 | 0.34209600  |
| H | -5.10637700 | -5.68711900 | -1.60751100 |
| H | -4.22209200 | -6.75909100 | -0.49846100 |
| H | -6.95557300 | -6.25901800 | -0.17824800 |
| H | -5.89953700 | -6.53164800 | 1.22620400  |
| C | -3.80539000 | -1.33561600 | 4.23378500  |
| C | -3.76735000 | -2.35842500 | 6.32388700  |
| C | -3.42661000 | -0.87612700 | 6.48662400  |
| H | -4.79542600 | -2.56831700 | 6.65783200  |
| H | -3.08661700 | -3.01857000 | 6.86842000  |
| H | -3.95973100 | -0.40300100 | 7.31618700  |
| H | -2.34505700 | -0.72814500 | 6.63978600  |
| C | -5.05931100 | 2.51765000  | -1.26309800 |
| C | -6.85420400 | 3.91806700  | -1.74135400 |
| C | -7.14596900 | 3.14925000  | -0.44458700 |
| H | -6.59878000 | 4.96971900  | -1.53974700 |
| H | -7.68956000 | 3.89885400  | -2.44706500 |
| H | -7.49701200 | 3.79786500  | 0.36300900  |
| H | -7.89869500 | 2.36113000  | -0.60199800 |
| C | -2.99351800 | 0.01638400  | -4.18619100 |
| C | -3.75247200 | -2.11593400 | -4.72059600 |
| C | -3.11482500 | -1.48705600 | -5.96673900 |
| H | -3.11295500 | -2.89992700 | -4.28904200 |
| H | -4.73836600 | -2.54707100 | -4.91593300 |
| H | -2.42244300 | -2.16190200 | -6.47726500 |
| H | -3.87711500 | -1.15974700 | -6.69113300 |
| C | -1.04720900 | 3.71445900  | -2.97443200 |
| C | 0.86110800  | 4.23032000  | -4.19153900 |
| C | -0.05964400 | 5.45299000  | -4.17736500 |
| H | 1.70854200  | 4.36249400  | -3.50279900 |
| H | 1.25321300  | 3.99901400  | -5.18482200 |
| H | 0.46613100  | 6.37891200  | -3.92771800 |
| H | -0.56709100 | 5.59261000  | -5.14472600 |
| C | 6.00030400  | -2.02377500 | -1.60989900 |
| C | 8.29466900  | -2.38942900 | -1.37863300 |
| C | 7.66185700  | -3.59150500 | -2.07622700 |
| H | 9.22083300  | -2.05571000 | -1.85526200 |
| H | 8.51136000  | -2.60946500 | -0.31951700 |
| H | 7.88193200  | -3.58469800 | -3.15506100 |
| H | 7.99018500  | -4.55024500 | -1.66508700 |
| C | 1.70305200  | -2.85375000 | -3.09927900 |
| C | 0.02576900  | -3.07392300 | -4.71767400 |
| C | -0.30034000 | -3.99222700 | -3.52322500 |
| H | -0.65595700 | -2.21239800 | -4.75291300 |
| H | -0.02797200 | -3.59870600 | -5.67823900 |
| H | -1.26235600 | -3.73204500 | -3.06632900 |
| H | -0.33099000 | -5.05399000 | -3.80260600 |
| C | 4.30004800  | -3.31855200 | 0.86058600  |
| C | 5.67965900  | -4.62219100 | 2.21041600  |

|    |             |             |             |
|----|-------------|-------------|-------------|
| C  | 5.75158700  | -3.16939000 | 2.67719000  |
| H  | 5.58691500  | -5.33587900 | 3.03349800  |
| H  | 6.56670800  | -4.89312800 | 1.61416000  |
| H  | 5.20320200  | -3.02232000 | 3.62080100  |
| H  | 6.77663600  | -2.81488400 | 2.82145500  |
| N  | -0.02111400 | 3.16591600  | -3.71241700 |
| N  | -1.00828200 | 5.08337500  | -3.14349500 |
| N  | 6.23669100  | -3.37648400 | -1.83922900 |
| N  | 7.23935000  | -1.40029000 | -1.49283000 |
| N  | 1.37857100  | -2.62979000 | -4.43165500 |
| N  | 0.78510900  | -3.73553300 | -2.59670400 |
| N  | -2.41861700 | -0.34917200 | -5.39134300 |
| N  | -3.85160100 | -0.97938400 | -3.81730600 |
| N  | -5.84994200 | 2.56949500  | -0.14039200 |
| N  | -5.70191300 | 3.20105200  | -2.27039500 |
| N  | -4.09835000 | -4.69539400 | -0.03712600 |
| N  | -0.16978200 | -3.90144200 | 1.97418700  |
| N  | -0.23195400 | -1.77773700 | 2.62450900  |
| N  | 5.09279300  | -2.45594200 | 1.59126000  |
| N  | 4.48864100  | -4.60370400 | 1.37580200  |
| N  | -6.19756700 | -4.50040800 | 0.72350900  |
| N  | -3.64425400 | -2.54890800 | 4.88163200  |
| N  | -3.84659000 | -0.34304100 | 5.20285700  |
| Si | -0.38282000 | -0.62505100 | -1.16477000 |
| C  | 3.14960800  | 4.67175000  | 3.32557600  |
| H  | 3.06888300  | 5.11304400  | 4.32379100  |
| H  | 2.88786600  | 3.61974400  | 3.38772900  |
| H  | 4.19050300  | 4.76464400  | 2.98301800  |
| C  | 0.79408200  | 6.01714000  | -0.75827800 |
| H  | 0.94503800  | 5.03332500  | -1.19644400 |
| H  | -0.27479700 | 6.12507900  | -0.52214800 |
| H  | 1.07082200  | 6.79507800  | -1.47783400 |
| C  | 4.14326300  | 2.41948000  | -1.24725500 |
| H  | 4.79234500  | 2.23118400  | -2.10739300 |
| H  | 3.47273000  | 1.56634600  | -1.14129100 |
| H  | 3.56120700  | 3.33374500  | -1.41346600 |
| C  | 5.71556600  | 2.09478100  | 3.41182600  |
| H  | 6.30390600  | 1.16884000  | 3.50004100  |
| H  | 6.17220200  | 2.85529200  | 4.05459000  |
| H  | 4.69685700  | 1.89516500  | 3.74638900  |
| C  | 5.33162400  | -4.21622400 | -2.60707600 |
| H  | 4.32007800  | -4.14245900 | -2.22012700 |
| H  | 5.32909200  | -3.94483700 | -3.67193400 |
| H  | 5.66763300  | -5.25325200 | -2.51160000 |
| C  | 7.35996700  | -0.16212100 | -0.76115500 |
| H  | 8.13129700  | 0.47294000  | -1.20990900 |
| H  | 6.39602400  | 0.34691900  | -0.78226900 |
| H  | 7.63557800  | -0.34799400 | 0.28927400  |
| C  | 0.69084500  | -4.19109100 | -1.23250500 |
| H  | -0.10125500 | -3.66587000 | -0.68711100 |
| H  | 0.46664900  | -5.26594200 | -1.21876200 |
| H  | 1.63660300  | -4.02111600 | -0.71992400 |
| C  | 1.89851000  | -1.48116100 | -5.13419800 |

|   |             |             |             |
|---|-------------|-------------|-------------|
| H | 2.87459700  | -1.23427700 | -4.71552500 |
| H | 2.00491100  | -1.71074900 | -6.19990500 |
| H | 1.23459400  | -0.60884800 | -5.02748900 |
| C | 4.22655200  | -5.76324100 | 0.55023300  |
| H | 5.06055900  | -5.97207600 | -0.13725000 |
| H | 4.07509500  | -6.63716200 | 1.19058900  |
| H | 3.32756900  | -5.58878500 | -0.03930400 |
| C | 4.80501200  | -1.04807700 | 1.81103200  |
| H | 4.31334100  | -0.90379200 | 2.78320200  |
| H | 5.74058400  | -0.48087900 | 1.81168300  |
| H | 4.14908000  | -0.64912500 | 1.03831400  |
| C | -0.70005800 | -5.24206700 | 1.93238900  |
| H | -1.72102800 | -5.20227600 | 1.55084000  |
| H | -0.08549700 | -5.86559800 | 1.27413000  |
| H | -0.71449500 | -5.70649900 | 2.93153800  |
| C | -0.60475200 | -0.38330600 | 2.73276900  |
| H | -0.11877100 | 0.04097000  | 3.61582300  |
| H | -0.27262300 | 0.18514300  | 1.86163700  |
| H | -1.68085900 | -0.28259600 | 2.83861300  |
| C | -7.17021400 | -4.13054500 | 1.72752900  |
| H | -7.01829300 | -4.68569900 | 2.66641100  |
| H | -7.06903300 | -3.06439300 | 1.92971800  |
| H | -8.17878500 | -4.34281100 | 1.35987700  |
| C | -3.01144800 | -4.21275900 | -0.86477700 |
| H | -2.59092700 | -3.29282200 | -0.46761200 |
| H | -2.21544600 | -4.96274100 | -0.89270800 |
| H | -3.35445400 | -4.04098400 | -1.89764600 |
| C | -5.09373000 | 3.64383400  | -3.50376300 |
| H | -4.66647200 | 4.65095300  | -3.41083100 |
| H | -4.30803200 | 2.95267500  | -3.80744000 |
| H | -5.85891300 | 3.66566000  | -4.28712000 |
| C | -5.68640400 | 1.64948400  | 0.97010700  |
| H | -6.48845100 | 0.89877200  | 0.97120100  |
| H | -4.73418700 | 1.12216700  | 0.87580200  |
| H | -5.72434700 | 2.19370200  | 1.92037900  |
| C | -4.10884800 | -3.81369100 | 4.34169500  |
| H | -3.75682400 | -3.94061800 | 3.32098600  |
| H | -3.68816800 | -4.61917700 | 4.95122100  |
| H | -5.20534100 | -3.89047700 | 4.36965100  |
| C | -3.52430600 | 1.02491000  | 4.85760700  |
| H | -2.43865400 | 1.20524700  | 4.84802800  |
| H | -3.91419600 | 1.22597700  | 3.85932700  |
| H | -3.99267500 | 1.70317100  | 5.57785400  |
| C | 0.64770700  | 2.71424600  | 5.40390600  |
| H | 0.16973600  | 2.37721400  | 6.32880300  |
| H | 1.35671400  | 1.96065200  | 5.06137700  |
| H | 1.19860000  | 3.64469300  | 5.61399800  |
| C | -1.34564700 | 3.27638200  | 0.94086300  |
| H | -0.56992600 | 2.71847500  | 0.42178500  |
| H | -2.26718200 | 2.68093300  | 0.90690500  |
| H | -1.52637300 | 4.21768600  | 0.41445600  |
| C | 0.60711400  | 1.90552600  | -3.33266900 |
| H | 0.98506400  | 1.94009200  | -2.30499500 |

|   |             |             |             |
|---|-------------|-------------|-------------|
| H | -0.10145700 | 1.08554000  | -3.43206300 |
| H | 1.43604300  | 1.71745900  | -4.01854500 |
| C | -2.12301800 | 5.93958700  | -2.82381700 |
| H | -2.72337600 | 5.44621400  | -2.05888700 |
| H | -1.75826600 | 6.89715800  | -2.43865600 |
| H | -2.75095500 | 6.13811500  | -3.70518100 |
| C | -4.53046800 | -1.12563200 | -2.54587400 |
| H | -3.98566100 | -1.77975700 | -1.86206400 |
| H | -4.63355700 | -0.16212200 | -2.05337000 |
| H | -5.52703400 | -1.54340500 | -2.72406100 |
| C | -1.73351700 | 0.60129100  | -6.23646700 |
| H | -2.40469100 | 1.02097100  | -7.00051600 |
| H | -1.35862600 | 1.41350800  | -5.61229800 |
| H | -0.89515200 | 0.11035100  | -6.74113800 |
| H | -0.46552700 | -1.34488000 | -2.47911500 |

7

**E = -1862.29995458 a.u.**

|    |             |             |             |
|----|-------------|-------------|-------------|
| Si | 0.82062600  | -1.30453100 | -1.08441100 |
| N  | -1.95742100 | -1.41785100 | -0.40792400 |
| N  | 1.97450000  | -0.50695700 | -0.04922800 |
| P  | -3.42598300 | -1.13939500 | 0.09354300  |
| P  | 3.49695500  | -0.84612100 | 0.16408100  |
| C  | -3.58623600 | -0.47826800 | 1.79293500  |
| H  | -4.63241800 | -0.33510900 | 2.07951400  |
| H  | -3.10589400 | -1.16965000 | 2.48981800  |
| H  | -3.05166800 | 0.47373100  | 1.81038000  |
| C  | -4.39929800 | -2.67749800 | 0.10672200  |
| H  | -4.42640300 | -3.08699800 | -0.90581400 |
| H  | -3.90708400 | -3.40100700 | 0.76099300  |
| H  | -5.41894900 | -2.49689800 | 0.45892100  |
| C  | -4.40710900 | 0.02872100  | -0.91649500 |
| H  | -5.41503500 | 0.17180800  | -0.51531500 |
| H  | -3.85717100 | 0.97212700  | -0.92070300 |
| H  | -4.46881000 | -0.35231800 | -1.93887000 |
| C  | 4.30179700  | -2.04971600 | -0.95704600 |
| H  | 3.76929900  | -3.00129000 | -0.89656300 |
| H  | 4.22552200  | -1.68657300 | -1.98443600 |
| H  | 5.35239400  | -2.18740200 | -0.68611700 |
| C  | 4.53644400  | 0.64951200  | 0.03718600  |
| H  | 4.17112200  | 1.39456700  | 0.74791200  |
| H  | 5.58695500  | 0.42740300  | 0.24523900  |
| H  | 4.44438500  | 1.05511800  | -0.97371100 |
| C  | 3.83914800  | -1.50001200 | 1.83304600  |
| H  | 4.91102300  | -1.64550200 | 1.99517600  |
| H  | 3.44518100  | -0.80135600 | 2.57476100  |
| H  | 3.31969800  | -2.45550900 | 1.94241400  |
| B  | -0.96743000 | -0.39269200 | -0.51110700 |
| N  | -1.27078500 | 0.98426200  | -0.22507100 |
| P  | -0.32091600 | 2.21430900  | -0.04532100 |
| C  | 0.66627800  | 2.22035800  | 1.49205700  |
| H  | 1.28008500  | 3.12243000  | 1.57865300  |

|   |             |            |             |
|---|-------------|------------|-------------|
| H | -0.00554400 | 2.14983700 | 2.35111300  |
| H | 1.29845700  | 1.32902900 | 1.44359400  |
| C | -1.30416100 | 3.74841900 | 0.02675600  |
| H | -1.85187600 | 3.86368600 | -0.91187300 |
| H | -2.02468600 | 3.66962800 | 0.84427500  |
| H | -0.66511700 | 4.62188600 | 0.18563600  |
| C | 0.92061400  | 2.54881800 | -1.35051800 |
| H | 0.41734200  | 2.59336100 | -2.31950700 |
| H | 1.44580400  | 3.49124800 | -1.16703700 |
| H | 1.63202700  | 1.72056500 | -1.34802300 |

7H<sup>+</sup>

E = -1862.78348515 a.u.

|    |             |             |             |
|----|-------------|-------------|-------------|
| Si | -0.81581000 | -0.28425900 | -0.93159700 |
| N  | 0.23389500  | 1.17505400  | -0.55792900 |
| N  | -2.03176100 | -0.61482200 | 0.14822400  |
| P  | 0.54183700  | 2.64351400  | 0.04808900  |
| P  | -3.55736400 | -0.97407800 | 0.13967500  |
| C  | 0.78450100  | 2.56150900  | 1.83921500  |
| H  | 1.04357600  | 3.54023100  | 2.25090400  |
| H  | -0.13101900 | 2.19028500  | 2.30558800  |
| H  | 1.59410000  | 1.85037100  | 2.02298600  |
| C  | -0.82337400 | 3.77520800  | -0.29605600 |
| H  | -0.96308100 | 3.84963800  | -1.37710600 |
| H  | -1.73481500 | 3.37842900  | 0.15791900  |
| H  | -0.61270800 | 4.76586500  | 0.11476700  |
| C  | 2.06613100  | 3.30071800  | -0.66599600 |
| H  | 2.34364700  | 4.24920700  | -0.19914200 |
| H  | 2.84337600  | 2.55066900  | -0.49622600 |
| H  | 1.93044800  | 3.44067300  | -1.74074200 |
| C  | -4.42859000 | -0.82262100 | -1.45502700 |
| H  | -4.35053600 | 0.20558600  | -1.81677500 |
| H  | -3.96605400 | -1.48834800 | -2.18780200 |
| H  | -5.48364500 | -1.08686200 | -1.34428100 |
| C  | -3.87071800 | -2.67930400 | 0.68759600  |
| H  | -3.41215000 | -2.82483100 | 1.66849700  |
| H  | -4.94311300 | -2.88215100 | 0.75191900  |
| H  | -3.41233300 | -3.37271900 | -0.02189300 |
| C  | -4.49965500 | 0.06904300  | 1.29386400  |
| H  | -5.54777500 | -0.23904900 | 1.33390600  |
| H  | -4.05780700 | -0.01569500 | 2.28949500  |
| H  | -4.44163100 | 1.11036100  | 0.96735100  |
| B  | 1.06133800  | -0.03846800 | -0.46230600 |
| N  | 2.36184000  | -0.17420700 | -0.04454300 |
| P  | 3.20951700  | -1.51281800 | 0.07077700  |
| C  | 3.73015800  | -1.80913500 | 1.78401600  |
| H  | 4.37324300  | -2.69061500 | 1.84922200  |
| H  | 4.27481100  | -0.93432700 | 2.14696500  |
| H  | 2.84386500  | -1.95851100 | 2.40559300  |
| C  | 4.74144600  | -1.39300100 | -0.89297500 |
| H  | 4.49148100  | -1.28674800 | -1.95134400 |
| H  | 5.29569400  | -0.50887400 | -0.56955500 |

|   |             |             |             |
|---|-------------|-------------|-------------|
| H | 5.36014500  | -2.28305700 | -0.75212400 |
| C | 2.39104400  | -3.04401100 | -0.47222600 |
| H | 2.10953300  | -2.94930900 | -1.52340300 |
| H | 3.06034100  | -3.89913000 | -0.34732200 |
| H | 1.48590800  | -3.19583000 | 0.12006900  |
| H | -1.28216000 | -0.14516200 | -2.33643800 |

8

**E = -2714.57635554 a.u.**

|    |             |             |             |
|----|-------------|-------------|-------------|
| Si | 0.96962600  | 0.03511100  | -2.04947700 |
| N  | -1.63074900 | 1.08402100  | -0.53412100 |
| N  | 1.79988900  | -0.19346700 | -0.55372200 |
| P  | -1.28827000 | 2.53888100  | -0.13290200 |
| P  | 3.22090900  | -0.49113200 | -0.01882200 |
| N  | 3.38488400  | -2.12627400 | 0.31776400  |
| N  | 3.49321400  | 0.41001500  | 1.37295700  |
| N  | 4.60361700  | -0.09820800 | -0.91840000 |
| N  | -0.99454300 | 2.61653600  | 1.52703800  |
| N  | -2.56320900 | 3.53839600  | -0.60328900 |
| N  | 0.02060400  | 3.41620100  | -0.72960800 |
| B  | -0.88700500 | 0.03846800  | -1.14998700 |
| N  | -1.26844000 | -1.33691600 | -1.10058900 |
| P  | -2.25042100 | -2.11672000 | -0.18383600 |
| N  | -3.84513300 | -1.61516400 | 0.09216300  |
| N  | -1.67573200 | -2.25462800 | 1.39704000  |
| N  | -2.52296600 | -3.62186900 | -0.89059800 |
| C  | 4.57712700  | -2.67152600 | 0.94227800  |
| H  | 4.30935700  | -3.30366000 | 1.79995700  |
| H  | 5.15374500  | -3.29165600 | 0.23860700  |
| H  | 5.23464000  | -1.87871900 | 1.29408100  |
| C  | 2.51373200  | -3.13360300 | -0.26978100 |
| H  | 1.59910200  | -2.67358700 | -0.63972200 |
| H  | 3.00770300  | -3.66364300 | -1.09908300 |
| H  | 2.24614400  | -3.87813400 | 0.49171800  |
| C  | 4.78849400  | 0.56854600  | 2.01494600  |
| H  | 4.91483300  | -0.11540000 | 2.86885600  |
| H  | 5.59082000  | 0.39107400  | 1.29905300  |
| H  | 4.88868400  | 1.59303900  | 2.39769400  |
| C  | 2.36824500  | 0.64138100  | 2.27042400  |
| H  | 1.43839500  | 0.61082700  | 1.70546700  |
| H  | 2.32465800  | -0.10705300 | 3.07708900  |
| H  | 2.46847700  | 1.63092400  | 2.73529700  |
| C  | 4.93566400  | -0.97994900 | -2.03920700 |
| H  | 4.80854500  | -2.02481800 | -1.75457700 |
| H  | 4.30930300  | -0.78229800 | -2.92042500 |
| H  | 5.98609100  | -0.82783800 | -2.31551900 |
| C  | 4.76812600  | 1.31334800  | -1.27504400 |
| H  | 4.15993800  | 1.58855700  | -2.14836400 |
| H  | 4.47701200  | 1.94876000  | -0.43752700 |
| H  | 5.82170400  | 1.50882900  | -1.50965200 |
| C  | -1.49316700 | -4.21455700 | -1.73431100 |
| H  | -0.84972700 | -4.91022800 | -1.17133300 |



|   |             |             |             |
|---|-------------|-------------|-------------|
| H | -1.96619900 | -4.78113500 | -2.54696500 |
| H | -0.87881200 | -3.42346200 | -2.16065900 |
| C | -3.44898000 | -4.59460200 | -0.33459200 |
| H | -4.24506600 | -4.08955700 | 0.21229900  |
| H | -3.90773900 | -5.17113200 | -1.14858400 |
| H | -2.95394700 | -5.31113400 | 0.33973900  |
| C | 0.02968900  | 3.78617000  | -2.14315200 |
| H | 0.59299000  | 3.06078200  | -2.74782100 |
| H | -0.98982700 | 3.83899600  | -2.52502300 |
| H | 0.50095300  | 4.77037500  | -2.26503100 |
| C | 1.36589200  | 3.30065500  | -0.17457600 |
| H | 1.85365700  | 4.28491700  | -0.19303100 |
| H | 1.32540900  | 2.94490400  | 0.85236700  |
| H | 1.98171000  | 2.59661300  | -0.74574800 |
| C | -0.82846900 | 3.87585100  | 2.23248300  |
| H | -1.76678200 | 4.22607800  | 2.68958500  |
| H | -0.09075200 | 3.75608400  | 3.03740500  |
| H | -0.46091700 | 4.64962400  | 1.55865200  |
| C | -1.34374800 | 1.50298200  | 2.39592400  |
| H | -1.43539400 | 0.59179400  | 1.80891300  |
| H | -0.55939000 | 1.36458800  | 3.15292000  |
| H | -2.29344700 | 1.67730700  | 2.92618200  |
| C | -3.87806500 | 2.97330500  | -0.86838200 |
| H | -4.36582400 | 3.54382500  | -1.66957600 |
| H | -3.76766400 | 1.93824500  | -1.18654800 |
| H | -4.53439400 | 3.00779600  | 0.01592800  |
| C | -2.58393900 | 4.96424400  | -0.32313000 |
| H | -1.56812100 | 5.35842100  | -0.28385900 |
| H | -3.11619100 | 5.48857100  | -1.12717100 |
| H | -3.09258400 | 5.20385400  | 0.62365000  |
| C | -4.10793300 | -0.55041000 | 1.06215600  |
| H | -3.80556800 | 0.43166000  | 0.67980900  |
| H | -5.18132700 | -0.53996600 | 1.28622500  |
| H | -3.56507800 | -0.73283700 | 1.98842600  |
| C | -4.66000600 | -1.45736800 | -1.11451000 |
| H | -5.72151200 | -1.50684000 | -0.84444800 |
| H | -4.47199300 | -0.49537700 | -1.61262300 |
| H | -4.44161500 | -2.25903800 | -1.82061800 |
| C | -0.26795100 | -2.03177300 | 1.69700100  |
| H | -0.17572700 | -1.51057300 | 2.65963600  |
| H | 0.28567100  | -2.98001100 | 1.77731500  |
| H | 0.20133800  | -1.42291200 | 0.92583100  |
| C | -2.34793600 | -3.09044500 | 2.38005700  |
| H | -1.92967800 | -4.10838200 | 2.41690400  |
| H | -2.23518600 | -2.64912100 | 3.37928200  |
| H | -3.41411600 | -3.16124200 | 2.16308000  |

**8H<sup>+</sup>**

**E = -2715.07016575 a.u.**

|    |             |             |             |
|----|-------------|-------------|-------------|
| Si | -0.64232500 | -0.48188400 | -1.13168000 |
| N  | 2.46495000  | 0.06071100  | -0.21153200 |
| N  | -1.73996800 | -1.18098800 | -0.09942300 |

|   |             |             |             |
|---|-------------|-------------|-------------|
| P | 3.34599600  | -1.24545000 | -0.06038600 |
| P | -3.29372500 | -1.28435300 | -0.01175400 |
| N | -3.90377700 | 0.01421200  | 0.87570100  |
| N | -3.68596600 | -2.76562100 | 0.64239100  |
| N | -4.24590000 | -1.22603100 | -1.38736200 |
| N | 3.90011300  | -1.30415900 | 1.51667400  |
| N | 4.56250100  | -1.21790000 | -1.19732000 |
| N | 2.66968800  | -2.75663900 | -0.25117200 |
| B | 1.15367600  | 0.05665000  | -0.61880100 |
| N | 0.12624900  | 1.10097400  | -0.59181500 |
| P | 0.13608800  | 2.62166700  | -0.05058900 |
| N | 1.51969800  | 3.42720800  | -0.46525400 |
| N | -0.05198800 | 2.61117400  | 1.59026900  |
| N | -1.08681000 | 3.48112100  | -0.73489800 |
| C | -5.33449100 | 0.12631100  | 1.16028000  |
| H | -5.61946500 | -0.41102800 | 2.07579300  |
| H | -5.59314000 | 1.18267500  | 1.29682800  |
| H | -5.92374800 | -0.26218700 | 0.33005500  |
| C | -3.07720600 | 0.56591100  | 1.94700700  |
| H | -2.02530500 | 0.48949400  | 1.67966800  |
| H | -3.32932400 | 1.62374400  | 2.08944100  |
| H | -3.24083000 | 0.04781600  | 2.90401400  |
| C | -5.06989200 | -3.17147800 | 0.86430300  |
| H | -5.37706900 | -3.02475500 | 1.90882600  |
| H | -5.74291300 | -2.60957300 | 0.21743900  |
| H | -5.18264600 | -4.23597600 | 0.62672800  |
| C | -2.71353400 | -3.55789400 | 1.38767400  |
| H | -1.70621300 | -3.21681100 | 1.15629500  |
| H | -2.87794300 | -3.47957100 | 2.47173700  |
| H | -2.80713200 | -4.61415500 | 1.10699400  |
| C | -4.47673900 | 0.04118400  | -2.08251400 |
| H | -4.51438900 | 0.86615400  | -1.37325800 |
| H | -3.69104900 | 0.24757500  | -2.82262900 |
| H | -5.43634800 | -0.00752200 | -2.60930400 |
| C | -4.20644900 | -2.36249400 | -2.31140000 |
| H | -3.43203400 | -2.23136600 | -3.07974700 |
| H | -4.00610300 | -3.28571400 | -1.76914600 |
| H | -5.17533500 | -2.45457600 | -2.81434400 |
| C | -2.42303700 | 2.89377900  | -0.81277600 |
| H | -3.12796100 | 3.46087100  | -0.19137800 |
| H | -2.78421800 | 2.90706600  | -1.84726100 |
| H | -2.42193900 | 1.86339400  | -0.46128100 |
| C | -1.02174400 | 4.89343000  | -1.10095200 |
| H | -0.01663100 | 5.27985100  | -0.94093900 |
| H | -1.28925600 | 5.02104700  | -2.15635100 |
| H | -1.72601500 | 5.48134100  | -0.49802800 |
| C | 2.41663800  | -3.29847200 | -1.58702300 |
| H | 1.39351800  | -3.07675600 | -1.91700400 |
| H | 3.11288900  | -2.87427000 | -2.30887200 |
| H | 2.54781300  | -4.38641800 | -1.56755200 |
| C | 1.71310000  | -3.24900100 | 0.74388800  |
| H | 1.80506900  | -4.33788000 | 0.82809100  |
| H | 1.91716800  | -2.80597500 | 1.71808500  |

|   |             |             |             |
|---|-------------|-------------|-------------|
| H | 0.68190100  | -3.00497900 | 0.45687300  |
| C | 4.71919000  | -2.41314400 | 2.00218900  |
| H | 5.79374900  | -2.20685000 | 1.90351200  |
| H | 4.50413400  | -2.58250300 | 3.06337000  |
| H | 4.48514500  | -3.32887900 | 1.46013800  |
| C | 4.09337600  | -0.07321300 | 2.27801100  |
| H | 3.41806800  | 0.69619800  | 1.90987300  |
| H | 3.87354600  | -0.26346100 | 3.33530400  |
| H | 5.12758600  | 0.29442500  | 2.20937000  |
| C | 4.91295100  | -0.00192000 | -1.92337500 |
| H | 5.14323700  | -0.25143700 | -2.96593900 |
| H | 4.07574100  | 0.69286600  | -1.90333900 |
| H | 5.79442300  | 0.48963400  | -1.48795700 |
| C | 5.61713000  | -2.22849900 | -1.19776800 |
| H | 5.26477600  | -3.15262900 | -0.73960800 |
| H | 5.90598100  | -2.45432400 | -2.23053600 |
| H | 6.51260400  | -1.88592900 | -0.66142500 |
| C | 2.65921300  | 3.48592100  | 0.45400600  |
| H | 3.27714600  | 2.58347200  | 0.37610500  |
| H | 3.26567100  | 4.36207000  | 0.20433500  |
| H | 2.31571200  | 3.59819900  | 1.48246300  |
| C | 1.91369500  | 3.38251000  | -1.87848300 |
| H | 2.47933000  | 4.28616000  | -2.12558400 |
| H | 2.53411200  | 2.50234600  | -2.08690600 |
| H | 1.02988300  | 3.34283600  | -2.51743900 |
| C | 0.51130500  | 1.57248700  | 2.45141800  |
| H | 1.39091300  | 1.94129900  | 2.99484000  |
| H | -0.24032400 | 1.26362500  | 3.18628100  |
| H | 0.80790700  | 0.70335400  | 1.86756500  |
| C | -0.48315400 | 3.80996600  | 2.30550400  |
| H | -1.21000200 | 3.52989100  | 3.07598800  |
| H | 0.35825700  | 4.31680100  | 2.79616600  |
| H | -0.96228000 | 4.51378400  | 1.62490400  |
| H | -1.16152800 | -0.25803500 | -2.50654700 |

9

**E = -4751.40666185 a.u.**

|    |             |             |             |
|----|-------------|-------------|-------------|
| Si | -0.97544600 | 0.45170600  | -1.61407500 |
| N  | 2.18995200  | 0.20439800  | -0.43810900 |
| N  | -1.77729300 | -0.63168100 | -0.48677100 |
| P  | 2.92799700  | -1.13845800 | -0.79589400 |
| P  | -3.06023700 | -1.09432400 | 0.22209500  |
| N  | -3.02666400 | -0.73740200 | 1.84777100  |
| N  | -3.37453800 | -2.73493000 | 0.08584800  |
| N  | -4.53343900 | -0.43112000 | -0.22641700 |
| N  | 4.51472200  | -0.75953100 | -1.18402600 |
| N  | 2.26380700  | -2.06584000 | -1.96771000 |
| N  | 3.02939700  | -2.21085500 | 0.47485100  |
| B  | 0.89854700  | 0.55961000  | -0.85199000 |
| N  | 0.11210600  | 1.70274500  | -0.54928200 |
| P  | 0.14573500  | 2.88546600  | 0.55190200  |
| N  | 1.56008800  | 3.70325300  | 0.45441000  |
| N  | 0.06069400  | 2.29714000  | 2.06123400  |

|   |             |             |             |
|---|-------------|-------------|-------------|
| N | -1.15419000 | 3.83075200  | 0.33471500  |
| C | 0.88362200  | 1.84053000  | 2.93236900  |
| C | 1.85754700  | 0.33539600  | 4.42173400  |
| C | 2.33226500  | 1.75864000  | 4.75026900  |
| H | 1.49302900  | -0.20100000 | 5.30461700  |
| H | 2.65043300  | -0.26535400 | 3.95759300  |
| H | 1.83403700  | 2.14904100  | 5.65296000  |
| H | 3.41404400  | 1.82320600  | 4.90749800  |
| C | -2.66159500 | -3.79735000 | 0.07980500  |
| C | -1.02536600 | -5.44622800 | 0.28353900  |
| C | -2.23793000 | -6.03800600 | -0.43678800 |
| H | -0.07886600 | -5.66365700 | -0.22118600 |
| H | -0.95294400 | -5.81243400 | 1.32103800  |
| H | -2.05361600 | -6.11409200 | -1.52271700 |
| H | -2.51719200 | -7.02998100 | -0.06775900 |
| C | -3.94347800 | -0.49323500 | 2.70711700  |
| C | -4.91206500 | 0.60424700  | 4.53285800  |
| C | -5.88737500 | -0.45270200 | 4.01006500  |
| H | -4.80626400 | 0.57859800  | 5.62266300  |
| H | -5.23089700 | 1.62126300  | 4.24884300  |
| H | -5.94653200 | -1.31659800 | 4.69240600  |
| H | -6.90215700 | -0.06421100 | 3.87331300  |
| C | -5.23421500 | -0.41009100 | -1.28925700 |
| C | -6.18224300 | -0.71324600 | -3.40111200 |
| C | -6.99310400 | 0.34024500  | -2.63845200 |
| H | -5.93583700 | -0.40569600 | -4.42226900 |
| H | -6.72329200 | -1.67269200 | -3.45237600 |
| H | -6.75569300 | 1.35849500  | -2.99237700 |
| H | -8.07424300 | 0.19191600  | -2.72396900 |
| C | 1.60729300  | -1.69434800 | -3.02532200 |
| C | 0.73616600  | -0.50628400 | -4.83923900 |
| C | -0.14993500 | -1.73728800 | -4.56660600 |
| H | 0.18994400  | 0.42138200  | -4.62635800 |
| H | 1.11562400  | -0.47315100 | -5.86837800 |
| H | -1.13374500 | -1.42326700 | -4.19585100 |
| H | -0.28917900 | -2.36577700 | -5.45439300 |
| C | 5.60615300  | -1.42340700 | -1.12685600 |
| C | 7.90601600  | -1.64132000 | -0.79436200 |
| C | 7.29127500  | -3.03448300 | -0.94433400 |
| H | 8.83099800  | -1.51970600 | -1.36661300 |
| H | 8.12619500  | -1.41147300 | 0.26270700  |
| C | 2.08728300  | 4.50345800  | -0.39939100 |
| C | 3.70331300  | 5.38127600  | -1.83276800 |
| C | 2.54124600  | 6.38258400  | -1.71167300 |
| H | 4.59059000  | 5.72405900  | -1.27581100 |
| H | 4.00195200  | 5.20030500  | -2.86957200 |
| H | 2.87847300  | 7.40402500  | -1.50852800 |
| H | 1.92591200  | 6.39993800  | -2.62517500 |
| C | -2.08281500 | 3.67031500  | -0.56714400 |
| C | -4.15835000 | 3.10576200  | -1.47804100 |
| C | -3.17134600 | 3.45091800  | -2.61575500 |
| H | -4.47363100 | 2.05946200  | -1.53731400 |
| H | -5.05192300 | 3.74472700  | -1.48009800 |

|   |             |             |             |
|---|-------------|-------------|-------------|
| H | -2.88602100 | 2.54440500  | -3.16785500 |
| H | -3.56463100 | 4.20260900  | -3.30971600 |
| N | -4.98630500 | -0.82283200 | -2.58593900 |
| N | -6.52889800 | 0.12743000  | -1.28301400 |
| N | -3.26047800 | -5.04939700 | -0.14778000 |
| N | -1.31389800 | -4.02491400 | 0.25336100  |
| N | -5.28900700 | -0.84445800 | 2.74442000  |
| N | -3.68148900 | 0.24664100  | 3.85709200  |
| N | 1.83531200  | -0.66666500 | -3.89987900 |
| N | 0.57290400  | -2.45687300 | -3.52599400 |
| N | 5.86318200  | -2.76345000 | -0.88036800 |
| N | 6.84369500  | -0.79461600 | -1.29971900 |
| N | 3.13682500  | 4.18976600  | -1.22951300 |
| N | 1.79240700  | 5.83836100  | -0.59491400 |
| N | 0.79451000  | 0.57758700  | 3.46449600  |
| N | 1.91713200  | 2.50799000  | 3.57330300  |
| N | -2.00650500 | 3.96215500  | -1.90507700 |
| N | -3.36667600 | 3.31853300  | -0.28122500 |
| H | 7.60386600  | -3.72553000 | -0.15475000 |
| H | 7.55581500  | -3.48441400 | -1.91432700 |
| C | 3.65774500  | -2.16373200 | 1.58633700  |
| C | 4.31279000  | -2.98258200 | 3.67761400  |
| C | 5.01390900  | -1.64816200 | 3.41160000  |
| H | 3.47317800  | -2.85345700 | 4.38229900  |
| H | 4.98305900  | -3.74933400 | 4.07771500  |
| H | 4.97194100  | -0.96495500 | 4.26578600  |
| H | 6.07137600  | -1.79510600 | 3.13833700  |
| N | 4.24745500  | -1.12947300 | 2.29273000  |
| N | 3.84291300  | -3.32456700 | 2.34911700  |
| C | 4.46890600  | 0.22722500  | 1.83590300  |
| H | 5.44525200  | 0.34047300  | 1.34868700  |
| H | 3.68005900  | 0.51854300  | 1.13753800  |
| H | 4.42743200  | 0.89547600  | 2.70291000  |
| C | 2.95590000  | -4.45227700 | 2.17950400  |
| H | 2.70209900  | -4.53507800 | 1.12268700  |
| H | 3.45714700  | -5.36787900 | 2.51015000  |
| H | 2.02232200  | -4.33592800 | 2.75250800  |
| C | -0.36714100 | -3.11460100 | 0.86221700  |
| H | 0.62853100  | -3.29078900 | 0.44771900  |
| H | -0.64700700 | -2.08904300 | 0.61846100  |
| H | -0.32820300 | -3.25705600 | 1.95239400  |
| C | -4.51166100 | -5.12587300 | -0.86414500 |
| H | -5.10494200 | -4.24475700 | -0.61898200 |
| H | -4.36005200 | -5.15323000 | -1.95665900 |
| H | -5.05657300 | -6.02957400 | -0.57096400 |
| C | -5.84983200 | -2.00382500 | 2.07931400  |
| H | -6.74225200 | -1.72502600 | 1.50799200  |
| H | -5.12532600 | -2.43995600 | 1.39376000  |
| H | -6.13419700 | -2.76184500 | 2.82513100  |
| C | -2.54869100 | 1.14666300  | 3.93178300  |
| H | -1.96263700 | 1.07439300  | 3.01750000  |
| H | -2.89279900 | 2.18414800  | 4.04011600  |
| H | -1.90286100 | 0.90845900  | 4.78432500  |

|   |             |             |             |
|---|-------------|-------------|-------------|
| C | -3.93319300 | -1.72839200 | -2.98522700 |
| H | -3.69530700 | -1.54450200 | -4.03819200 |
| H | -3.04037800 | -1.53221200 | -2.39282300 |
| H | -4.22699900 | -2.78052800 | -2.86510800 |
| C | -6.96337400 | 0.99985100  | -0.21907400 |
| H | -6.43978900 | 0.71103200  | 0.69404100  |
| H | -6.74238900 | 2.05787100  | -0.43067200 |
| H | -8.04457600 | 0.89780400  | -0.07334000 |
| C | -3.78785200 | 2.82497100  | 1.00691300  |
| H | -2.96571900 | 2.97645900  | 1.70605600  |
| H | -4.67408000 | 3.37198000  | 1.35677300  |
| H | -4.02536800 | 1.75848500  | 0.94846900  |
| C | -0.76397000 | 4.07287700  | -2.63042500 |
| H | 0.00403200  | 4.47710700  | -1.97460600 |
| H | -0.43939000 | 3.08846700  | -2.99341200 |
| H | -0.90224000 | 4.75532400  | -3.47747300 |
| C | 0.61718700  | 6.50326700  | -0.08723800 |
| H | -0.14907100 | 6.62410500  | -0.86511600 |
| H | 0.18240700  | 5.90053700  | 0.70897200  |
| H | 0.88871400  | 7.49543000  | 0.29325400  |
| C | 3.90517200  | 2.97217200  | -1.10283800 |
| H | 4.77908200  | 3.11559100  | -0.44805200 |
| H | 3.27807800  | 2.16959600  | -0.70682300 |
| C | 0.27555400  | -0.52834500 | 2.68066700  |
| H | -0.40461800 | -0.14996900 | 1.91854100  |
| H | 1.09391100  | -1.05923300 | 2.17965100  |
| H | -0.27788500 | -1.21656000 | 3.32481400  |
| C | 1.96048100  | 3.95343100  | 3.63147800  |
| H | 1.30149400  | 4.34817500  | 4.42106700  |
| H | 2.98608100  | 4.27183200  | 3.84554500  |
| H | 1.66584600  | 4.35828800  | 2.66504100  |
| C | -0.17743900 | -3.32513300 | -2.64309400 |
| H | -0.68989100 | -4.09214200 | -3.23450800 |
| H | 0.51692400  | -3.80531500 | -1.95487600 |
| H | -0.91109400 | -2.76004700 | -2.05605500 |
| C | 2.73765600  | 0.44084700  | -3.70412300 |
| H | 3.60209500  | 0.13078100  | -3.11774900 |
| H | 3.08287300  | 0.78727100  | -4.68593700 |
| H | 2.24271900  | 1.27028300  | -3.18140700 |
| C | 4.96725100  | -3.85848100 | -1.20911600 |
| H | 4.00023200  | -3.48783500 | -1.54505700 |
| H | 5.40958500  | -4.46257900 | -2.01454500 |
| H | 4.81237700  | -4.49881700 | -0.33476600 |
| C | 6.96886100  | 0.63760800  | -1.17057200 |
| H | 6.02524900  | 1.09264800  | -1.46829000 |
| H | 7.19388300  | 0.94259100  | -0.13598700 |
| H | 7.77499400  | 1.00037200  | -1.81724800 |
| H | 4.26172500  | 2.66828900  | -2.09245500 |

**9H<sup>+</sup>**

**E = -4751.95078014 a.u.**

|    |             |             |            |
|----|-------------|-------------|------------|
| Si | 0.64936200  | -0.73027500 | 1.16765600 |
| N  | -2.52988000 | -0.23336900 | 0.52292800 |

|   |             |             |             |
|---|-------------|-------------|-------------|
| N | 1.79688800  | -1.07231400 | -0.00223300 |
| P | -3.32401900 | -1.49681500 | -0.01981200 |
| P | 3.36677300  | -0.97301200 | 0.06840000  |
| N | 3.86636200  | 0.57403500  | -0.16305100 |
| N | 4.08126500  | -1.93702100 | -1.07330100 |
| N | 4.04834000  | -1.46115700 | 1.49523300  |
| N | -4.36432000 | -2.03008000 | 1.12834500  |
| N | -2.42115000 | -2.78910800 | -0.44794100 |
| N | -4.20467600 | -1.07240200 | -1.36724300 |
| B | -1.20523400 | -0.20949500 | 0.86171000  |
| N | -0.23496000 | 0.85165800  | 1.07973600  |
| P | -0.08259500 | 2.46956400  | 1.00259600  |
| N | -1.46587100 | 3.21239900  | 1.43772200  |
| N | 0.36444100  | 2.87421200  | -0.51954400 |
| N | 1.11956000  | 2.94108400  | 1.97667400  |
| C | 0.24605900  | 3.94615200  | -1.21920700 |
| C | -0.02274500 | 5.14923900  | -3.19833300 |
| C | -0.03612300 | 6.12150700  | -2.01322700 |
| H | 0.61712200  | 5.48720000  | -4.01811600 |
| H | -1.03617000 | 4.98819900  | -3.59999700 |
| H | 0.88856800  | 6.71552300  | -1.96985100 |
| H | -0.88316500 | 6.81270500  | -2.04078300 |
| C | 4.12441800  | -1.95026700 | -2.35327800 |
| C | 3.98338300  | -1.51051900 | -4.63777900 |
| C | 4.63537100  | -2.87957100 | -4.43313600 |
| H | 3.19386800  | -1.52033900 | -5.39454500 |
| H | 4.72613100  | -0.74920900 | -4.92318500 |
| H | 3.92157200  | -3.69471300 | -4.63783300 |
| H | 5.51981800  | -3.03241300 | -5.05718800 |
| C | 4.91417400  | 1.11802100  | -0.67037300 |
| C | 6.16185200  | 2.85682100  | -1.61340700 |
| C | 7.03032300  | 1.59551300  | -1.52508200 |
| H | 6.22007100  | 3.34638500  | -2.58957200 |
| H | 6.43908200  | 3.59328800  | -0.84215600 |
| H | 7.16519300  | 1.12809500  | -2.51280100 |
| H | 8.01912300  | 1.78568800  | -1.09868700 |
| C | 3.88608300  | -2.52668800 | 2.20110700  |
| C | 3.42815900  | -4.65289800 | 3.04200200  |
| C | 4.03104700  | -3.79970500 | 4.15676100  |
| H | 2.52949100  | -5.19262700 | 3.35247300  |
| H | 4.15684800  | -5.38400400 | 2.65897000  |
| H | 3.25960200  | -3.46263300 | 4.86822300  |
| H | 4.81378700  | -4.31750800 | 4.71819100  |
| C | -1.36066700 | -2.97332500 | -1.15558300 |
| C | 0.33962500  | -4.27511500 | -2.08938500 |
| C | 0.49388100  | -2.82549500 | -2.55436700 |
| H | 1.28368100  | -4.70877400 | -1.74626800 |
| H | -0.07260800 | -4.92244900 | -2.88107600 |
| H | 1.29926700  | -2.32113300 | -2.01371400 |
| H | 0.66006000  | -2.73507900 | -3.63207400 |
| C | -5.26901400 | -2.93848500 | 1.20223300  |
| C | -7.08271400 | -4.02044100 | 2.20108400  |
| C | -6.69998300 | -4.75316900 | 0.91381800  |

|   |             |             |             |
|---|-------------|-------------|-------------|
| H | -7.24256300 | -4.69529900 | 3.04662300  |
| H | -7.99486600 | -3.41642400 | 2.06470400  |
| C | -2.56798000 | 3.57754800  | 0.87940400  |
| C | -4.36032100 | 4.01261700  | -0.53850200 |
| C | -4.66806600 | 4.59728000  | 0.84392500  |
| H | -4.12112700 | 4.80223600  | -1.26742300 |
| H | -5.17299800 | 3.40295200  | -0.94069400 |
| H | -5.05035900 | 5.62070700  | 0.80115100  |
| H | -5.39770000 | 3.98037100  | 1.39124900  |
| C | 1.62724900  | 2.34297800  | 3.01730700  |
| C | 3.29019200  | 1.74841800  | 4.54075000  |
| C | 1.97636400  | 1.03771200  | 4.90730400  |
| H | 4.13452200  | 1.06026400  | 4.46960600  |
| H | 3.54836800  | 2.53890600  | 5.26108800  |
| H | 2.00811900  | -0.03033400 | 4.64814500  |
| H | 1.71870400  | 1.13694100  | 5.96516900  |
| N | 3.11270900  | -3.65883700 | 2.02130800  |
| N | 4.56514800  | -2.68138000 | 3.40210400  |
| N | 4.97837800  | -2.82554200 | -3.02220900 |
| N | 3.43709600  | -1.23740100 | -3.31604500 |
| N | 6.23786400  | 0.74352100  | -0.65093500 |
| N | 4.83879700  | 2.31495600  | -1.36685400 |
| N | -0.60232900 | -4.12247300 | -0.99619900 |
| N | -0.79402000 | -2.24663000 | -2.17640800 |
| N | -5.81638400 | -3.79191400 | 0.26235600  |
| N | -5.92033500 | -3.17693400 | 2.40294300  |
| N | -3.19389000 | 3.18522900  | -0.27297000 |
| N | -3.36270400 | 4.54400400  | 1.47923400  |
| N | 0.48456400  | 3.93408100  | -2.58474500 |
| N | -0.11481700 | 5.22530300  | -0.86445600 |
| N | 1.00730700  | 1.72980100  | 4.06815600  |
| N | 2.97041200  | 2.31114600  | 3.24364100  |
| H | -7.55999100 | -4.98665100 | 0.28017400  |
| H | -6.16530600 | -5.69067100 | 1.13121900  |
| C | -5.19540900 | -0.28174100 | -1.56655800 |
| C | -6.77892400 | 0.84203000  | -2.86704200 |
| C | -7.04117700 | 1.12295100  | -1.38723800 |
| H | -6.29943700 | 1.70524500  | -3.35930200 |
| H | -7.68493800 | 0.58900100  | -3.42430300 |
| H | -7.23774100 | 2.17829200  | -1.17734800 |
| H | -7.89107100 | 0.53267500  | -1.01169000 |
| N | -5.79030900 | 0.68938600  | -0.77515500 |
| N | -5.87142200 | -0.28621400 | -2.78104100 |
| C | -5.64816100 | 0.80141400  | 0.66587900  |
| H | -6.23285300 | 0.04310900  | 1.19990100  |
| H | -4.59802100 | 0.70997300  | 0.94494700  |
| H | -6.00880900 | 1.79210000  | 0.95847300  |
| C | -5.26010900 | -0.81392400 | -3.97874100 |
| H | -4.58883300 | -1.62523600 | -3.69764800 |
| H | -6.03302800 | -1.19432600 | -4.65326700 |
| H | -4.67915600 | -0.04544800 | -4.51283200 |
| C | 2.71542300  | -0.00095200 | -3.10325100 |
| H | 1.96113200  | 0.09326300  | -3.89093300 |



|   |             |             |             |
|---|-------------|-------------|-------------|
| H | 2.21082300  | -0.01919000 | -2.13801000 |
| H | 3.37914700  | 0.87322200  | -3.14274600 |
| C | 5.45926200  | -4.02055100 | -2.36437200 |
| H | 5.64523200  | -3.78863500 | -1.31570000 |
| H | 4.72663400  | -4.84150800 | -2.41964500 |
| H | 6.38812300  | -4.35202300 | -2.83727500 |
| C | 6.75656500  | -0.54140100 | -0.23347500 |
| H | 7.76957600  | -0.39615000 | 0.15654700  |
| H | 6.12767100  | -0.95522200 | 0.55394200  |
| H | 6.79338500  | -1.25702000 | -1.06467300 |
| C | 3.67966900  | 3.17431800  | -1.31100800 |
| H | 2.83198300  | 2.60052700  | -0.93616500 |
| H | 3.84920600  | 4.03232800  | -0.64401800 |
| H | 3.44038200  | 3.56235900  | -2.30694200 |
| C | 2.62546800  | -4.16172000 | 0.74972700  |
| H | 1.84408600  | -4.89847900 | 0.95879700  |
| H | 2.18468800  | -3.35617800 | 0.16840400  |
| H | 3.42345900  | -4.64501000 | 0.16967900  |
| C | 5.13094200  | -1.55757800 | 4.10557900  |
| H | 5.35375000  | -0.77431100 | 3.38077200  |
| H | 4.43272900  | -1.16309500 | 4.86075500  |
| H | 6.05143400  | -1.85777800 | 4.61654100  |
| C | 3.96551600  | 2.89181500  | 2.38107400  |
| H | 3.45344200  | 3.30364700  | 1.51322800  |
| H | 4.51301900  | 3.69169700  | 2.89750200  |
| H | 4.67121700  | 2.12569600  | 2.04397200  |
| C | -0.40707500 | 1.46795100  | 4.20787600  |
| H | -0.97643100 | 2.17761700  | 3.60803200  |
| H | -0.66562500 | 0.45342200  | 3.88576200  |
| H | -0.68518300 | 1.59158200  | 5.26042700  |
| C | -3.23544500 | 4.85425200  | 2.88639300  |
| H | -3.82116000 | 4.16384800  | 3.51168900  |
| H | -2.18522300 | 4.77700100  | 3.16709800  |
| H | -3.58753300 | 5.87380000  | 3.06805900  |
| C | -2.64871700 | 2.38864600  | -1.34696200 |
| H | -2.16945600 | 3.01964500  | -2.10792300 |
| H | -1.94011700 | 1.66481100  | -0.96134700 |
| C | 0.49494300  | 2.69752200  | -3.33243900 |
| H | 0.73335800  | 1.88751900  | -2.64475500 |
| H | -0.48213300 | 2.49367200  | -3.79553000 |
| H | 1.25089900  | 2.74222600  | -4.12262400 |
| C | 0.02553200  | 5.79122100  | 0.46870100  |
| H | 0.61825200  | 6.71152900  | 0.40532300  |
| H | -0.95203600 | 6.02797500  | 0.89964700  |
| H | 0.54244300  | 5.09547800  | 1.12928900  |
| C | -1.00727700 | -0.83842800 | -2.43397100 |
| H | -0.78197700 | -0.64575600 | -3.48932800 |
| H | -2.04789800 | -0.57699400 | -2.25245300 |
| H | -0.35565800 | -0.21075800 | -1.81454400 |
| C | -1.12201800 | -5.27783000 | -0.30803000 |
| H | -1.78967200 | -4.93593000 | 0.48304600  |
| H | -1.68022600 | -5.94593900 | -0.98311800 |
| H | -0.29620900 | -5.84671200 | 0.13123400  |

|   |             |             |             |
|---|-------------|-------------|-------------|
| C | -5.19200200 | -4.19235200 | -0.98422100 |
| H | -4.77154300 | -3.32873100 | -1.49470200 |
| H | -4.39610900 | -4.93116100 | -0.82690300 |
| H | -5.96552600 | -4.63364000 | -1.62066300 |
| C | -5.90010500 | -2.21062100 | 3.47572600  |
| H | -4.95074100 | -1.67613800 | 3.44028500  |
| H | -6.72155800 | -1.48210000 | 3.38694300  |
| H | -5.99828100 | -2.72489100 | 4.43671900  |
| H | -3.46661300 | 1.83085900  | -1.80724800 |
| H | 1.19203600  | -0.85487400 | 2.55564600  |

## 10

**E = -1321.46307165 a.u.**

|    |             |             |             |
|----|-------------|-------------|-------------|
| Si | 0.00000100  | 0.74487300  | -0.00028300 |
| N  | 1.33963700  | -0.31754700 | -0.00182500 |
| N  | -1.33963800 | -0.31754400 | -0.00242600 |
| P  | 2.88357300  | -0.11029600 | -0.00018400 |
| P  | -2.88357400 | -0.11029500 | -0.00023300 |
| C  | 3.70256600  | -0.87745800 | -1.44116000 |
| H  | 4.79067200  | -0.78034100 | -1.38121900 |
| H  | 3.42832400  | -1.93409400 | -1.48112900 |
| H  | 3.34255900  | -0.38881700 | -2.35000800 |
| C  | 3.70024000  | -0.88421200 | 1.43851200  |
| H  | 3.33867200  | -0.39987300 | 2.34904000  |
| H  | 3.42596900  | -1.94103300 | 1.47304200  |
| H  | 4.78844700  | -0.78677100 | 1.38088200  |
| C  | 3.54418600  | 1.60184600  | 0.00442100  |
| H  | 4.63819000  | 1.60079800  | 0.00550800  |
| H  | 3.17809200  | 2.12819300  | -0.88025200 |
| H  | 3.17634400  | 2.12403900  | 0.89082800  |
| C  | -3.54418600 | 1.60184100  | 0.00604900  |
| H  | -3.17623700 | 2.12319700  | 0.89290300  |
| H  | -3.17820200 | 2.12902400  | -0.87817200 |
| H  | -4.63819000 | 1.60079000  | 0.00727200  |
| C  | -3.70290000 | -0.87618100 | -1.44169700 |
| H  | -3.42861200 | -1.93276500 | -1.48272100 |
| H  | -4.79099500 | -0.77917700 | -1.38138000 |
| H  | -3.34315900 | -0.38667600 | -2.35018400 |
| C  | -3.69990500 | -0.88548800 | 1.43796900  |
| H  | -4.78812300 | -0.78794900 | 1.38070700  |
| H  | -3.42567000 | -1.94235100 | 1.47145000  |
| H  | -3.33808200 | -0.40200600 | 2.34885000  |

## 10H<sup>+</sup>

**E = -1321.90663232 a.u.**

|    |             |             |             |
|----|-------------|-------------|-------------|
| N  | 1.09841900  | -0.05876100 | 0.01499300  |
| P  | 2.67414000  | 0.15244300  | 0.00141400  |
| Si | -0.01653800 | -1.23628900 | -0.00307000 |
| N  | -1.62093400 | -1.05396000 | -0.00569400 |
| P  | -2.71807800 | 0.10116200  | -0.00100900 |
| C  | 3.16045400  | 1.20221800  | -1.39129200 |
| H  | 4.23684500  | 1.39135900  | -1.36763800 |
| H  | 2.90043900  | 0.70351200  | -2.32811500 |

|   |             |             |             |
|---|-------------|-------------|-------------|
| H | 2.62122100  | 2.15019800  | -1.32970900 |
| C | 3.21912900  | 0.99942900  | 1.50602200  |
| H | 3.00207100  | 0.37177700  | 2.37366600  |
| H | 4.29297800  | 1.19921900  | 1.46230700  |
| H | 2.67595800  | 1.94226400  | 1.60218200  |
| C | 3.67401800  | -1.35881400 | -0.12589500 |
| H | 3.42557500  | -1.88639700 | -1.05019000 |
| H | 4.73786400  | -1.10637900 | -0.13262000 |
| H | 3.46623100  | -2.01057900 | 0.72645000  |
| C | -2.08394900 | 1.77210400  | -0.32001800 |
| H | -1.31561000 | 2.00952700  | 0.41928100  |
| H | -1.63527000 | 1.80127300  | -1.31586500 |
| H | -2.89231700 | 2.50594900  | -0.26320800 |
| C | -3.97284900 | -0.23188100 | -1.26076500 |
| H | -4.40850300 | -1.21653900 | -1.07631100 |
| H | -4.75663400 | 0.52940300  | -1.22890700 |
| H | -3.50273700 | -0.23018500 | -2.24703300 |
| C | -3.57674700 | 0.16210800  | 1.59172300  |
| H | -4.38111900 | 0.90178400  | 1.56217400  |
| H | -3.99322700 | -0.82433300 | 1.80787700  |
| H | -2.86542300 | 0.42906300  | 2.37695300  |
| H | 0.41952700  | -2.63886300 | -0.01814400 |

## 11

**E = -1889.64953755 a.u.**

|    |             |             |             |
|----|-------------|-------------|-------------|
| N  | -0.93211300 | 0.01791200  | -0.60741700 |
| P  | -2.39867100 | -0.00134400 | -0.11405900 |
| N  | -3.23351100 | -1.31133500 | -0.76338600 |
| N  | -3.46606300 | 1.26929700  | -0.43399700 |
| N  | -2.42993700 | -0.01708900 | 1.57218800  |
| Si | 0.00786900  | 0.96224900  | -1.69359300 |
| N  | 1.62910400  | 0.51076900  | -1.39300100 |
| P  | 2.53590000  | 0.08648800  | -0.20917700 |
| N  | 2.88139600  | 1.26424400  | 0.96023800  |
| N  | 4.05491000  | -0.32154400 | -0.78981900 |
| N  | 1.93303900  | -1.15293900 | 0.76694700  |
| C  | 5.04194100  | -0.92549500 | 0.08782700  |
| H  | 6.04895600  | -0.60768100 | -0.21122800 |
| H  | 4.88600700  | -0.60166800 | 1.11796900  |
| H  | 5.01503200  | -2.02583500 | 0.05740500  |
| C  | 4.30529800  | -0.50359600 | -2.21106200 |
| H  | 5.27009000  | -0.05352500 | -2.48146400 |
| H  | 4.34121300  | -1.56925000 | -2.48414100 |
| H  | 3.51174700  | -0.02054300 | -2.77988000 |
| C  | 3.77053600  | 2.34948400  | 0.54201400  |
| H  | 4.12233400  | 2.88274100  | 1.43229000  |
| H  | 4.63218600  | 1.94529000  | 0.01168800  |
| H  | 3.26319300  | 3.07125000  | -0.11560800 |
| C  | 1.71649500  | 1.78358100  | 1.68124700  |
| H  | 1.11258900  | 2.45948000  | 1.05605500  |
| H  | 1.07491900  | 0.96902100  | 2.01349500  |
| H  | 2.05879600  | 2.34015600  | 2.56084000  |

|   |             |             |             |
|---|-------------|-------------|-------------|
| C | 2.45046200  | -1.49411000 | 2.08403800  |
| H | 1.62214300  | -1.81621000 | 2.72980400  |
| H | 3.18115300  | -2.31662200 | 2.04475200  |
| H | 2.92700200  | -0.62761500 | 2.54146600  |
| C | 1.30638900  | -2.28003000 | 0.08681800  |
| H | 0.91121300  | -1.95714300 | -0.87417700 |
| H | 2.01631300  | -3.10835200 | -0.06544100 |
| H | 0.46687200  | -2.65393500 | 0.68504600  |
| C | -1.31551000 | -0.61716800 | 2.29145100  |
| H | -1.53023100 | -1.65570200 | 2.59142700  |
| H | -0.42773000 | -0.60618200 | 1.66000500  |
| H | -1.11325200 | -0.04407300 | 3.20657400  |
| C | -3.66067400 | 0.03762400  | 2.34669500  |
| H | -4.03514900 | -0.96328200 | 2.61099000  |
| H | -3.48105700 | 0.58201000  | 3.28310400  |
| H | -4.43602000 | 0.56592600  | 1.79225600  |
| C | -3.14434800 | 2.56779600  | 0.16310200  |
| H | -2.75752300 | 2.43432600  | 1.17341900  |
| H | -2.39465000 | 3.11327000  | -0.42815500 |
| H | -4.05443400 | 3.17748400  | 0.21405000  |
| C | -3.94833100 | 1.41718300  | -1.80969000 |
| H | -4.87080700 | 2.01005900  | -1.80342700 |
| H | -3.21179400 | 1.92502700  | -2.44854900 |
| H | -4.16326100 | 0.43962400  | -2.24013800 |
| C | -2.50664300 | -2.44049700 | -1.32397600 |
| H | -2.39473800 | -3.26190700 | -0.59824400 |
| H | -3.04846200 | -2.83344800 | -2.19413500 |
| H | -1.51693300 | -2.11594700 | -1.64002800 |
| C | -4.58322200 | -1.63812900 | -0.33120200 |
| H | -5.13720400 | -2.09087800 | -1.16339000 |
| H | -4.59442100 | -2.35366600 | 0.50566300  |
| H | -5.11481500 | -0.73590900 | -0.02729800 |

**11H<sup>+</sup>**

**E = -1890.09616761 a.u.**

|    |             |             |             |
|----|-------------|-------------|-------------|
| N  | 1.07068400  | -0.03115000 | -0.60781100 |
| P  | 2.56450500  | -0.01022200 | -0.10591500 |
| N  | 3.34418900  | 1.26814000  | -0.82430000 |
| N  | 3.55844200  | -1.30187400 | -0.42685200 |
| N  | 2.52729300  | 0.03357000  | 1.55757300  |
| Si | -0.07506000 | -0.80495400 | -1.43792900 |
| N  | -1.67102900 | -0.61476600 | -1.26346200 |
| P  | -2.66039800 | -0.04562400 | -0.15890100 |
| N  | -3.06283200 | -1.17606500 | 1.00042200  |
| N  | -4.02435600 | 0.44970300  | -0.93863200 |
| N  | -2.03647800 | 1.20601800  | 0.73341700  |
| C  | -5.02718000 | 1.25851100  | -0.25102200 |
| H  | -5.89910200 | 0.65901800  | 0.04239200  |
| H  | -4.61049600 | 1.71736000  | 0.64538500  |
| H  | -5.37157300 | 2.05787500  | -0.91585400 |
| C  | -4.48290100 | -0.13490700 | -2.19961400 |
| H  | -5.34831200 | -0.79148700 | -2.04012700 |

|   |             |             |             |
|---|-------------|-------------|-------------|
| H | -4.78210700 | 0.66702700  | -2.88314800 |
| H | -3.67947600 | -0.70740900 | -2.65951400 |
| C | -4.17535000 | -2.09422400 | 0.74172100  |
| H | -4.52691600 | -2.49772800 | 1.69609500  |
| H | -5.00575600 | -1.56837200 | 0.27201600  |
| H | -3.87931800 | -2.93504000 | 0.09935000  |
| C | -1.95867700 | -1.80902600 | 1.72537500  |
| H | -1.53792700 | -2.65764800 | 1.16603700  |
| H | -1.16248800 | -1.08746500 | 1.91464200  |
| H | -2.32147400 | -2.17890500 | 2.68945700  |
| C | -2.38486100 | 1.51074300  | 2.11990700  |
| H | -1.47233600 | 1.66598700  | 2.70773200  |
| H | -2.98338900 | 2.42915400  | 2.18229700  |
| H | -2.95308300 | 0.69223200  | 2.55771300  |
| C | -1.41173200 | 2.32191500  | 0.02361400  |
| H | -1.24889800 | 2.06729300  | -1.02359200 |
| H | -2.04763500 | 3.21506600  | 0.06618400  |
| H | -0.44144300 | 2.55818900  | 0.47321200  |
| C | 1.38066300  | 0.58990900  | 2.27232000  |
| H | 1.56333800  | 1.62889400  | 2.58141700  |
| H | 0.49481900  | 0.56064400  | 1.63986700  |
| H | 1.19382400  | -0.00120000 | 3.17678300  |
| C | 3.76141900  | 0.04320800  | 2.34479500  |
| H | 4.06947800  | 1.06442700  | 2.60519300  |
| H | 3.60156500  | -0.51159600 | 3.27582600  |
| H | 4.57051800  | -0.44009000 | 1.79808900  |
| C | 3.34090500  | -2.57139300 | 0.27380800  |
| H | 2.93545500  | -2.39547300 | 1.26895100  |
| H | 2.64856800  | -3.22081600 | -0.28040600 |
| H | 4.29534500  | -3.09859500 | 0.37051600  |
| C | 4.08013200  | -1.49682800 | -1.78437500 |
| H | 5.05584600  | -1.98983600 | -1.72761600 |
| H | 3.41109200  | -2.13062300 | -2.38246900 |
| H | 4.19930500  | -0.54026400 | -2.29035400 |
| C | 2.60820300  | 2.43308800  | -1.31412300 |
| H | 3.09772100  | 2.81523300  | -2.21649800 |
| H | 1.58547600  | 2.15661500  | -1.56317800 |
| H | 2.58760500  | 3.24119600  | -0.56974200 |
| C | 4.74523100  | 1.55825200  | -0.51117700 |
| H | 5.23536900  | 1.96791500  | -1.40071200 |
| H | 4.83839900  | 2.29323900  | 0.29917300  |
| H | 5.27218300  | 0.64827800  | -0.22495300 |
| H | 0.30856400  | -1.73656200 | -2.50677000 |

12

**E = -3247.53032238 a.u.**

|   |            |             |             |
|---|------------|-------------|-------------|
| N | 0.76574700 | -0.98191900 | 0.59959400  |
| P | 2.20309500 | -0.42954800 | 0.38855000  |
| N | 3.19386000 | -1.65517500 | -0.17019400 |
| N | 2.87878400 | 0.33737800  | 1.70367800  |
| N | 2.41361100 | 0.70795300  | -0.80594100 |
| C | 2.87475900 | 0.02564900  | 2.95307000  |
| C | 2.82762500 | -1.04811200 | 5.02704300  |

|    |             |             |             |
|----|-------------|-------------|-------------|
| C  | 2.60189700  | 0.45721800  | 5.22737100  |
| H  | 2.04000800  | -1.65311100 | 5.48698200  |
| H  | 3.79621100  | -1.37865900 | 5.43211500  |
| H  | 1.54142400  | 0.67082700  | 5.43425200  |
| H  | 3.20169100  | 0.87270300  | 6.04332000  |
| C  | 4.31189800  | -1.66692200 | -0.79304300 |
| C  | 5.84867200  | -2.52693500 | -2.32628200 |
| C  | 6.41840400  | -1.24841800 | -1.71130000 |
| H  | 6.58065700  | -3.33882300 | -2.37827700 |
| H  | 5.46415300  | -2.34626900 | -3.34459500 |
| H  | 7.21916000  | -1.47753700 | -0.98990600 |
| H  | 6.82058700  | -0.55469800 | -2.45615100 |
| C  | 2.18007600  | 1.96539200  | -0.85844800 |
| C  | 1.41405300  | 4.15623200  | -0.56161600 |
| C  | 2.30836300  | 4.10581500  | -1.81399800 |
| H  | 0.43978100  | 4.61605700  | -0.76209700 |
| H  | 1.89016000  | 4.71775600  | 0.25545100  |
| H  | 1.71189200  | 4.18064600  | -2.73894900 |
| H  | 3.05540700  | 4.90589900  | -1.83187900 |
| N  | 1.25902000  | 2.75500700  | -0.22103500 |
| N  | 2.92975100  | 2.80317900  | -1.68742700 |
| N  | 2.99215800  | 1.00911800  | 3.93871100  |
| N  | 2.81103200  | -1.18177100 | 3.58262300  |
| N  | 5.26347800  | -0.68010900 | -1.02740000 |
| N  | 4.76916900  | -2.83250100 | -1.40867600 |
| C  | 2.91882700  | -2.49322900 | 2.98919000  |
| H  | 1.96654600  | -3.02917700 | 3.07645600  |
| H  | 3.17501400  | -2.41597900 | 1.93357400  |
| H  | 3.70616200  | -3.06044000 | 3.50445600  |
| C  | 2.61621600  | 2.37133000  | 3.63573800  |
| H  | 2.84704400  | 2.56709200  | 2.58821900  |
| H  | 1.53959200  | 2.54323900  | 3.79683200  |
| H  | 3.17616000  | 3.06369000  | 4.27331300  |
| C  | 5.53936000  | 0.42047900  | -0.12135300 |
| H  | 5.83520800  | 1.30266400  | -0.69901100 |
| H  | 4.66473400  | 0.66824800  | 0.47448100  |
| H  | 6.36629200  | 0.15922800  | 0.55756700  |
| C  | 3.85199300  | -3.90089700 | -1.73349600 |
| H  | 3.06731300  | -3.92417700 | -0.97732700 |
| H  | 3.38525700  | -3.75526000 | -2.72056000 |
| H  | 4.38682300  | -4.85618900 | -1.74125700 |
| C  | 0.15525000  | 2.29667400  | 0.59017600  |
| H  | -0.76063600 | 2.80201800  | 0.26776300  |
| H  | 0.01668800  | 1.22719800  | 0.44840900  |
| H  | 0.31615700  | 2.49709200  | 1.65618900  |
| C  | 3.73793300  | 2.27137200  | -2.75503300 |
| H  | 4.03707100  | 1.25795100  | -2.48213700 |
| H  | 3.18530500  | 2.23308600  | -3.70825100 |
| H  | 4.62872400  | 2.89278500  | -2.90184900 |
| Si | -0.33842900 | -1.31862000 | 1.87705400  |
| N  | -1.90897500 | -1.10095600 | 1.27283900  |
| P  | -2.66021400 | -0.39303900 | 0.09120800  |
| N  | -3.27612900 | 1.05418600  | 0.64111100  |

|   |             |             |             |
|---|-------------|-------------|-------------|
| N | -3.95087500 | -1.27626700 | -0.48038100 |
| N | -1.81790300 | 0.02498400  | -1.25170900 |
| C | -4.95493300 | -1.83415900 | 0.09103600  |
| C | -6.68072100 | -2.50520800 | 1.49849900  |
| C | -6.76742500 | -3.30104200 | 0.19508300  |
| H | -6.77399800 | -3.13185900 | 2.39038000  |
| H | -7.45735200 | -1.72440500 | 1.54256400  |
| H | -6.38139900 | -4.32598900 | 0.32836800  |
| H | -7.78517900 | -3.36655900 | -0.20181900 |
| C | -3.45947000 | 2.18656200  | 0.08270400  |
| C | -3.42244100 | 4.51941000  | -0.01832600 |
| C | -3.88617400 | 3.96812700  | -1.36962300 |
| H | -4.03260700 | 5.35856900  | 0.33072400  |
| H | -2.37228700 | 4.85892600  | -0.06288400 |
| H | -4.96521000 | 4.13458700  | -1.51842900 |
| H | -3.35624000 | 4.41662000  | -2.21629700 |
| C | -0.89903400 | -0.53503000 | -1.95398700 |
| C | 0.71348400  | -1.94917000 | -2.84410900 |
| C | 0.83481300  | -0.58274400 | -3.53540200 |
| H | 1.51379100  | -2.09509900 | -2.10905200 |
| H | 0.71877300  | -2.78498200 | -3.55234500 |
| H | 1.85522600  | -0.18961600 | -3.48666600 |
| H | 0.51633000  | -0.62236600 | -4.59058400 |
| N | -0.57438700 | -1.85165800 | -2.17021300 |
| N | -0.06336400 | 0.22701400  | -2.74557500 |
| N | -5.90362400 | -2.52223300 | -0.67185900 |
| N | -5.35277700 | -1.91833500 | 1.40835600  |
| N | -3.59969700 | 2.54668700  | -1.25048000 |
| N | -3.55460600 | 3.35892600  | 0.83891500  |
| C | -4.90192000 | -1.04747200 | 2.47951700  |
| H | -5.18007300 | -1.51341900 | 3.43003600  |
| H | -3.81628600 | -0.94570300 | 2.43990300  |
| H | -5.36506600 | -0.05348200 | 2.42009100  |
| C | -5.55048300 | -3.04566800 | -1.97090100 |
| H | -4.84433900 | -2.35937100 | -2.43857500 |
| H | -5.07875900 | -4.03923300 | -1.90032700 |
| H | -6.44793200 | -3.13171300 | -2.59236000 |
| C | -4.14709200 | 1.66845000  | -2.26787700 |
| H | -3.50293500 | 1.65549600  | -3.15254500 |
| H | -4.22729700 | 0.65042600  | -1.89228800 |
| H | -5.14738600 | 2.02039100  | -2.56228300 |
| C | -3.01683400 | 3.40733400  | 2.18010800  |
| H | -3.03103200 | 2.39558200  | 2.58670700  |
| H | -1.97897800 | 3.77487400  | 2.18945500  |
| H | -3.62476500 | 4.06933200  | 2.80592900  |
| C | -1.00962200 | -2.97350400 | -1.37047100 |
| H | -0.32678600 | -3.14856000 | -0.53237000 |
| H | -2.01065100 | -2.79267900 | -0.98389500 |
| H | -1.03819500 | -3.86289300 | -2.01220500 |
| C | -0.33500700 | 1.59436000  | -3.07912700 |
| H | -1.00661700 | 2.00549700  | -2.32324900 |
| H | 0.59717800  | 2.16831600  | -3.09388400 |
| H | -0.81043600 | 1.69102000  | -4.06977800 |

12H<sup>+</sup>

E = -3248.02447318 a.u.

|   |             |             |             |
|---|-------------|-------------|-------------|
| N | -0.93988100 | 0.34543600  | 1.12298700  |
| P | -2.39248700 | 0.19411800  | 0.51848500  |
| N | -3.07274400 | 1.68599300  | 0.57766200  |
| N | -3.25249200 | -0.98372600 | 1.28669900  |
| N | -2.46737600 | -0.21210600 | -1.06152600 |
| C | -3.30379100 | -1.32611600 | 2.53196200  |
| C | -3.32272300 | -1.40646100 | 4.85969800  |
| C | -3.43594600 | -2.83018900 | 4.30745900  |
| H | -2.55850000 | -1.30589600 | 5.63447400  |
| H | -4.28085300 | -1.05887600 | 5.27292900  |
| H | -2.48820300 | -3.38118800 | 4.40928000  |
| H | -4.22436200 | -3.41348000 | 4.79055400  |
| C | -4.04112500 | 2.22380400  | -0.08766400 |
| C | -5.12063500 | 3.95360100  | -1.21367900 |
| C | -6.01050800 | 2.70891400  | -1.23175900 |
| H | -5.66253400 | 4.86318700  | -0.94210300 |
| H | -4.63595700 | 4.11813900  | -2.18879400 |
| H | -6.85595500 | 2.81110100  | -0.53547000 |
| H | -6.40855900 | 2.47802900  | -2.22328600 |
| C | -2.43554000 | -1.35330400 | -1.66809800 |
| C | -2.09495200 | -3.57516800 | -2.28884600 |
| C | -2.83143400 | -2.84500200 | -3.42619000 |
| H | -1.21856200 | -4.12692600 | -2.64041800 |
| H | -2.75590200 | -4.27950600 | -1.76436900 |
| H | -2.17600900 | -2.66928000 | -4.29372900 |
| H | -3.71366400 | -3.38912100 | -3.77456500 |
| N | -1.70085900 | -2.47648400 | -1.41938700 |
| N | -3.19918700 | -1.59504700 | -2.78746500 |
| N | -3.73402500 | -2.58155200 | 2.90613200  |
| N | -2.97673800 | -0.62592000 | 3.67224300  |
| N | -5.10068900 | 1.66116600  | -0.77010500 |
| N | -4.13601800 | 3.59365000  | -0.20625500 |
| C | -3.05618400 | 0.81920100  | 3.80179300  |
| H | -2.26948300 | 1.16628300  | 4.47778600  |
| H | -2.92967500 | 1.30933400  | 2.83921200  |
| H | -4.02957300 | 1.11322400  | 4.22054800  |
| C | -3.77136200 | -3.68506100 | 1.97334800  |
| H | -3.91648100 | -3.28459200 | 0.96999900  |
| H | -2.83667300 | -4.26581500 | 1.99564000  |
| H | -4.59917200 | -4.35503900 | 2.22397300  |
| C | -5.70009900 | 0.37939900  | -0.44337000 |
| H | -6.10407000 | -0.07031900 | -1.35550200 |
| H | -4.96682200 | -0.29885600 | -0.01503600 |
| H | -6.52465400 | 0.50909600  | 0.27276400  |
| C | -2.99076200 | 4.44947600  | 0.01459000  |
| H | -2.38840000 | 4.02842100  | 0.81866700  |
| H | -2.36655300 | 4.53423800  | -0.88780500 |
| H | -3.33314400 | 5.44856100  | 0.29797100  |
| C | -0.74090200 | -2.64839100 | -0.35204600 |
| H | 0.01536800  | -3.36779000 | -0.67917200 |



|    |             |             |             |
|----|-------------|-------------|-------------|
| H  | -0.24202900 | -1.70197100 | -0.15268000 |
| H  | -1.20682200 | -3.01511900 | 0.56945900  |
| C  | -3.95195700 | -0.57937600 | -3.47899300 |
| H  | -4.03653500 | 0.28967700  | -2.82472800 |
| H  | -3.45903600 | -0.27906100 | -4.41532100 |
| H  | -4.95268300 | -0.94958100 | -3.72888100 |
| Si | 0.29101400  | 0.35079800  | 2.14933900  |
| N  | 1.87392000  | 0.29420200  | 1.81471200  |
| P  | 2.69272400  | 0.12969100  | 0.44044000  |
| N  | 3.63397300  | -1.19416900 | 0.61813400  |
| N  | 3.59701900  | 1.46266100  | 0.13564500  |
| N  | 1.78879100  | -0.14826100 | -0.88420600 |
| C  | 4.57403400  | 2.06177000  | 0.73443600  |
| C  | 6.35616600  | 2.68836200  | 2.08689300  |
| C  | 6.09866600  | 3.79493100  | 1.06011800  |
| H  | 6.46496800  | 3.06687500  | 3.10638200  |
| H  | 7.25448900  | 2.10524700  | 1.83532600  |
| H  | 5.59122600  | 4.65876100  | 1.51766300  |
| H  | 7.01146300  | 4.14908800  | 0.57402100  |
| C  | 4.15005400  | -2.02015700 | -0.22483600 |
| C  | 4.86027200  | -4.11644300 | -0.95505500 |
| C  | 5.09875400  | -3.09072800 | -2.06574000 |
| H  | 5.72096200  | -4.76877500 | -0.78467100 |
| H  | 3.98608800  | -4.75129500 | -1.17162500 |
| H  | 6.16804000  | -2.85323500 | -2.16963600 |
| H  | 4.72714200  | -3.41904200 | -3.04047700 |
| C  | 0.98256300  | 0.48980900  | -1.65989000 |
| C  | -0.51367100 | 1.96618700  | -2.66132900 |
| C  | -0.31484400 | 0.76150400  | -3.58767500 |
| H  | -1.48965700 | 1.92218900  | -2.16337200 |
| H  | -0.41031000 | 2.92386300  | -3.18016100 |
| H  | -1.26316700 | 0.33676600  | -3.92730000 |
| H  | 0.28710900  | 1.01821300  | -4.47355700 |
| N  | 0.55579600  | 1.79139300  | -1.68219000 |
| N  | 0.39850300  | -0.16459900 | -2.72982800 |
| N  | 5.22275200  | 3.11622900  | 0.11900000  |
| N  | 5.15592100  | 1.86768700  | 1.96023500  |
| N  | 4.36678900  | -1.92173600 | -1.58492800 |
| N  | 4.60032000  | -3.25913300 | 0.18856800  |
| C  | 5.02340600  | 0.68554700  | 2.79225500  |
| H  | 5.35201900  | 0.94791400  | 3.80183100  |
| H  | 3.98265100  | 0.36953500  | 2.83707200  |
| H  | 5.63439500  | -0.14735300 | 2.42347300  |
| C  | 4.61664800  | 3.85504800  | -0.96536800 |
| H  | 3.97306700  | 3.18138400  | -1.53110200 |
| H  | 4.01093700  | 4.69637900  | -0.59557000 |
| H  | 5.39671400  | 4.25221100  | -1.62165900 |
| C  | 4.57795600  | -0.67962300 | -2.30561700 |
| H  | 4.05209400  | -0.71281400 | -3.26528700 |
| H  | 4.20898900  | 0.17029700  | -1.73805400 |
| H  | 5.64998200  | -0.53332100 | -2.50208400 |
| C  | 4.14842000  | -3.84636000 | 1.43100500  |
| H  | 3.94061100  | -3.04454300 | 2.13887900  |

|   |             |             |             |
|---|-------------|-------------|-------------|
| H | 3.23254600  | -4.43999600 | 1.28793700  |
| H | 4.92710100  | -4.50086800 | 1.83341500  |
| C | 0.63145300  | 2.74358700  | -0.59339600 |
| H | -0.27020700 | 2.69998100  | 0.02785700  |
| H | 1.51330000  | 2.55043900  | 0.01270600  |
| H | 0.72838600  | 3.74896500  | -1.01824500 |
| C | 0.94761800  | -1.38081400 | -3.27480600 |
| H | 1.56120100  | -1.85649600 | -2.50915500 |
| H | 0.14102900  | -2.05928000 | -3.57200400 |
| H | 1.57303400  | -1.18090400 | -4.15877900 |
| H | 0.01765700  | 0.46715700  | 3.59206300  |
